# Supplementary material for: A natural biological adhesive from snail mucus for wound repair
Source: PubMed Central journal article supplement (PMC9873654; doi:10.1038/s41467-023-35907-4), 2023-01-24
Supplement: 41467_2023_35907_MOESM1_ESM.pdf [file 41467_2023_35907_MOESM1_ESM.pdf]

## **Supplementary Information**

### **A Natural Biological Adhesive from Snail Mucus for Wound Repair**

Tuo Deng, Dongxiu Gao, Xuemei Song, Zhipeng Zhou, Lixiao Zhou, Maixian Tao, Zexiu Jiang, Lian Yang, Lan Luo, Ankun Zhou, Lin Hu, Hongbo Qin & Mingyi Wu\*

\*Corresponding author: Mingyi Wu

Email: wumingyi@mail.kib.ac.cn

#### **This PDF file includes:**

Supplementary Methods

Supplementary Figures 1–17

Supplementary Tables 1–12

Supplementary References 1–3

## **Supplementary Methods**

### **1. Characteristic staining analysis of d-SMG**

#### **1.1 Staining analysis of polymers and calcium salt in d-SMG**

Fresh snail mucus was evenly smeared on glass slide. After drying naturally, the slide was immersed in 5% formaldehyde solution for 5 h. Then, the slide was dried and immersed in 1,9-dimethylmethylene blue staining solution, Coomassie brilliant blue staining solution or Alizarin red staining solution for 5 min. Then, slide was rinsed and dried. After that, the photos of stained SMGs were captured via Carl Zeiss Microscopy GmbH (Axio Scan Z1, Germany).

#### **1.2 Arnow staining: identification of L-Dopa**

To test the presence of L-3,4-dihydroxyphenylalanine (L-Dopa) in the snail mucus, Arnow staining was performed. The d-SMG samples (10.0 mg) were accurately weighed and hydrolyzed in 2 mL HCl (6 M) for 22 h at 110 °C. The pH was adjusted to 6 ~ 8 with NaOH (10 M). Then, the solution was diluted to 10.0 mL with deionized water, the diluent was centrifuged at 4000×g for 15 min, and the supernatant was stained with nitrite - molybdic acid solution (Arnow reaction)<sup>1</sup>. L-Dopa solution (10 µg/mL) was used as a positive control.

### **2. Compositional Analysis of d-SMG**

#### **2.1 Protein molecular weight analysis by SDS-PAGE**

2.0 mg d-SMG was accurately weighed and dissolved in 2.0 mL PBS, and the supernatant was collected after 15000 × g centrifugation. Then solution was denatured by boiling at 100 °C for 10 min. After mixing with loading buffer containing bromophenol blue, the marker and d -SMG proteins were separated by a 10% polyacrylamide gel. The protein in the gel was stained by Coomassie brilliant blue and photos were captured.

#### **2.2 Quantification of total protein in d-SMG**

The protein content of d-SMG was measured by using the Bicinchoninic Acid (BCA) Protein Assay Kit (Solarbio, Beijing China). Bovine Serum Albumin (BSA) was used as the standard substance and the equation of linear regression was established according to the kit instruction. 25.0 mg d-SMG was accurately weighed and dissolved in 25 mL PBS. After centrifugation (15000 × g, 15 min), the absorbance of the protein in supernatant was detected, and protein content was calculated from the standard curve

#### **2.3 Quantification of amino acids in d-SMG**

The d-SMG (10 ~ 20 mg) were accurately weighed and hydrolyzed in 10 mL HCl (6 M) at 110 °C for 22 ~ 24 h. The solution was diluted to 25.00 mL, and 1.00 mL solution was evaporated in a water bath at 60 °C.

The samples were redissolved in sample diluent and the amino acid content was determined by an amino acid analyzer (A300, Membra Pure GmbH, Germany). The test results are exported by the Chromatography Data Handling System.

#### **2.4 FTIR spectra analysis of d-SMG and s-GAG**

FTIR spectra (4000–400  $\text{cm}^{-1}$ ) were recorded using an FTIR spectrometer (Nicolet iS10, Thermo Scientific, USA) by the KBr compression method, and spectral data were recorded as absorbance units. PeakFit v4.12 software was applied to analyze the secondary structure, where the raw spectra (1600–1700  $\text{cm}^{-1}$ ) of amide I were deconvoluted, peak-split, and curve-fitted by Gaussian functions.

#### **2.5 Quantification of s-GAG in d-SMG**

The 1,9-dimethylmethylene blue assay and carbazole method efficient methods in measuring the sulfated glycosaminoglycan content<sup>2,3</sup>. The s-GAG was obtained as described in **Extraction and Purification of the s-GAG** in text. The concentration of s-GAG was measured as previously reported<sup>2,3</sup> by using ultraviolet (UV) spectrophotometry and pure snail GAG and glucuronic acid as control.

#### **2.6 Quantification of elements in d-SMG**

The d-SMG was pulverized to powder for 15 min in an agate mortar. Then the content of C, H, O, N, S, and P in d-SMG was tested by Elementar (Vario EL cube, Germany). Approximately 2 mg d-SMG was added into 2.0 mL nitric acid (67%) and 0.5 mL  $\text{H}_2\text{O}_2$  (30%), after heating at 180 °C for 40 min the mixture was cooled to room temperature. Then, the internal standard element Cs (0.1 mL, 1.0  $\mu\text{g}/\text{mL}$ ) was added, and the solution was diluted to 100.0 mL with 1% nitric acid. The contents of inorganic elements (Na, K, Mg, Ca, Fe, etc.) were determined by ICP–OES730 (Agilent, USA) and ICP–MS7800 (Agilent, USA).

#### **2.7 Quantification of allantoin in d-SMG**

The allantoin content of d-SMG was measured by high-performance liquid chromatography (HPLC, Agilent 1100, USA) with a hydrophilic chromatographic column (HILIC, Phenomenex Luna®, USA), which had the capability of partially retaining polar compounds. Standard curve was established with 0.040, 0.060, 0.080, 0.120, and 0.160 mg/mL allantoin. 25.0 mg d-SMG was dissolved in 25 mL deionized water and heated in a water bath at 60 °C for 15 min. Then the solution was stirred in a vortex device for approximately 2 min, and cooled to room temperature. After centrifugation (15000  $\times$  g, 15 min), and the supernatant was subjected to HPLC analysis, and the allantoin content was calculated from the standard curve.

#### **2.8 NMR analysis of s-GAG in d-SMG**

The NMR analysis was performed at 298 K in D<sub>2</sub>O with a Bruker Avance spectrometer of 800 MHz equipped with a <sup>13</sup>C/<sup>1</sup>H dual probe in FT mode. All samples were dissolved in D<sub>2</sub>O (99.9%) at 10~20 mg/ml, and spectra were recorded with HDO suppression by presaturation.

## **2.9 Analysis of proteins in d-SMG by mass spectrometry**

Briefly, d-SMG proteins were extracted and digested, and the obtained peptides were analyzed and detected by liquid chromatography tandem mass spectrometry (LC-MS/MS) (LC: Easy-nLC 1200, Thermo Fisher Scientific, USA; MS: Q Exactive™ Hybrid Quadrupole-Orbitrap™ Mass Spectrometer, Thermo Fisher Scientific, USA). In addition, proteins from two d-SMGs were separated by SDS-PAGE. The proteins from SDS-PAGE bands were also analyzed by LC-MS after enzymatic hydrolysis. The MS data were analyzed based on two protein databases (<https://www.uniprot.org/uniprotkb?query=Stylommatophora> and <https://www.uniprot.org/uniprotkb?query=Gastropoda%20mucin>) by using Maxquant (1.6.2.10). The complete data are available in Source Data and/or ProteomeXchange with identifier PXD036781 (Reviewer account details: Username: reviewer\_pxd036781@ebi.ac.uk, Password: R83ttMLM).

## **2.10 Raman spectroscopy analysis of the interaction of d-SMG and tissue**

Two pieces of mouse skin tissue were adhered with a layer of d-SMG. Then the adhered tissues were cut into 10 μm slices by Frozen histopathological section system (CryoStar NX50, ThermoFisher Scientific, USA). Raman spectra were recorded with an inVia Raman microscope (Renishaw, UK) using a 532 nm laser. The visual field of the adhesion area between tissue and d-SMG was selected and scanned.

Supplementary Figures

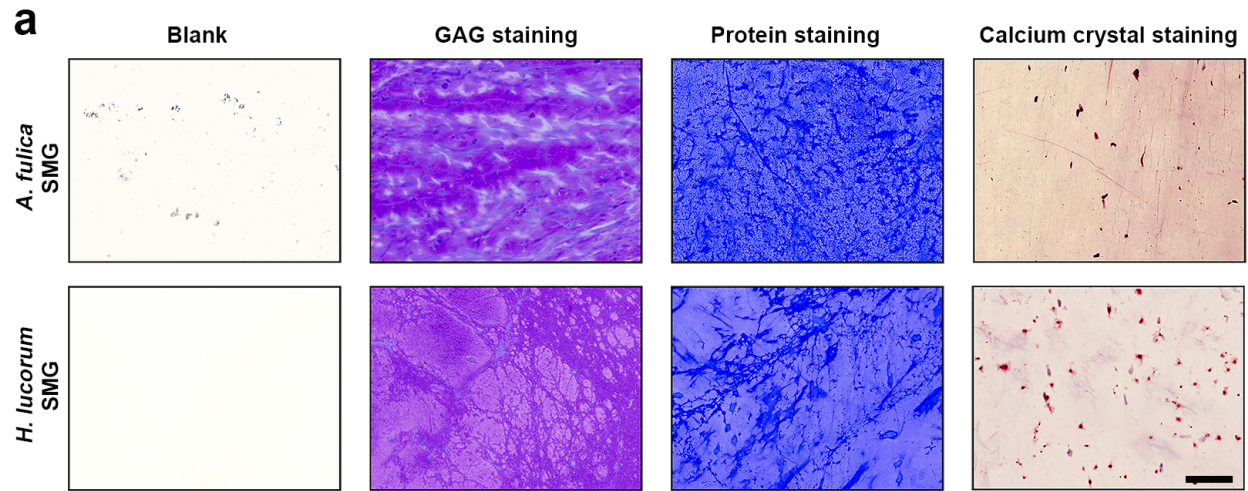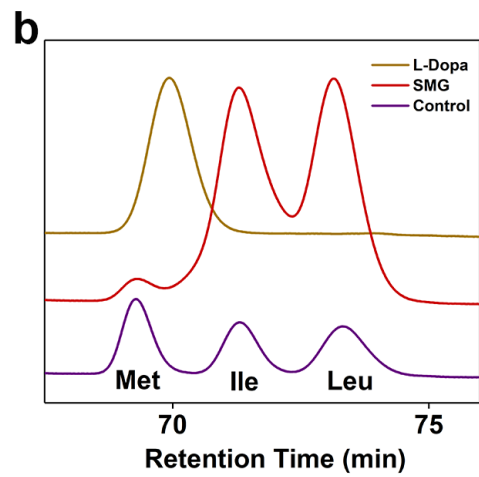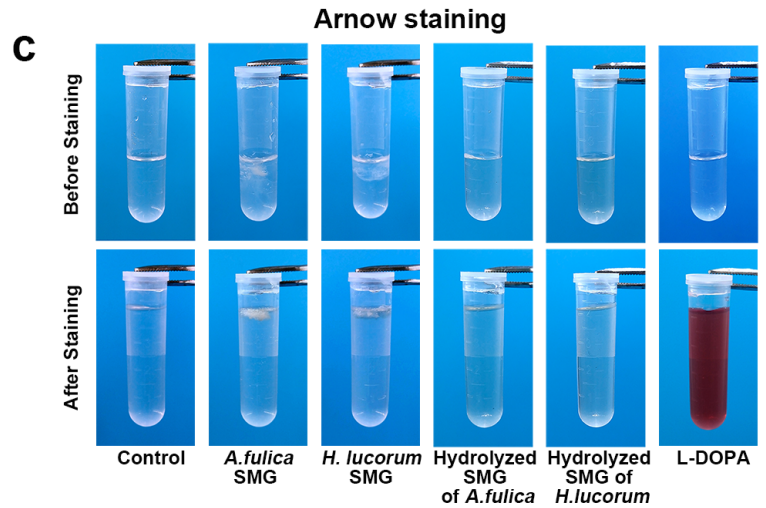

**Supplementary Fig. 1. Qualitative identification of the main components of SMGs.** **a** Staining of protein, GAG, and calcium salt in SMG ( $n = 1$  biologically independent sample in each group). **b** Representative graph of amino acid analysis. **c** Arrow staining of SMG and hydrolyzed SMG. Scale bars, 100  $\mu\text{m}$  (images in **a**). Source data are provided as a Source data file.

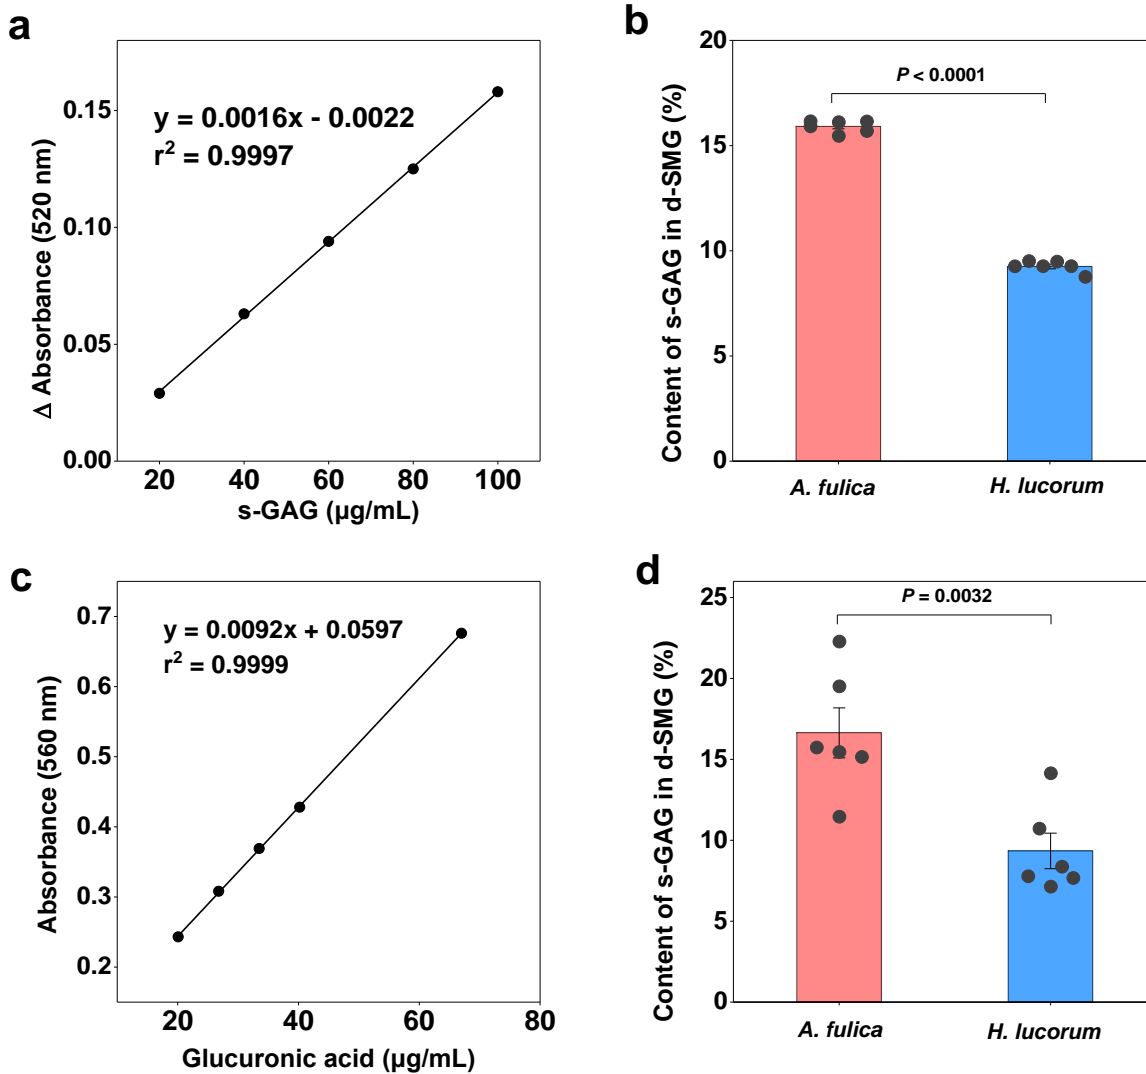

**Supplementary Fig. 2. s-GAG content in two d-SMGs.** **a-b**  $\Delta A_{520\text{nm}}$  - s-GAG concentration standard curve (**a**) and the content of s-GAG in two d-SMGs (**b**) determined by 1,9-dimethylmethylene blue assay ( $n = 5$  biologically independent samples in each group). **c-d**  $A_{560\text{nm}}$  - glucuronic acid concentration standard curve (**c**) and the content of s-GAG in two d-SMGs (**d**) determined by carbazole method ( $n = 5$  biologically independent samples in each group). For **b** and **d**, two-tailed t test was used. Data are presented as mean values  $\pm$  SEM. Source data are provided as a Source data file.

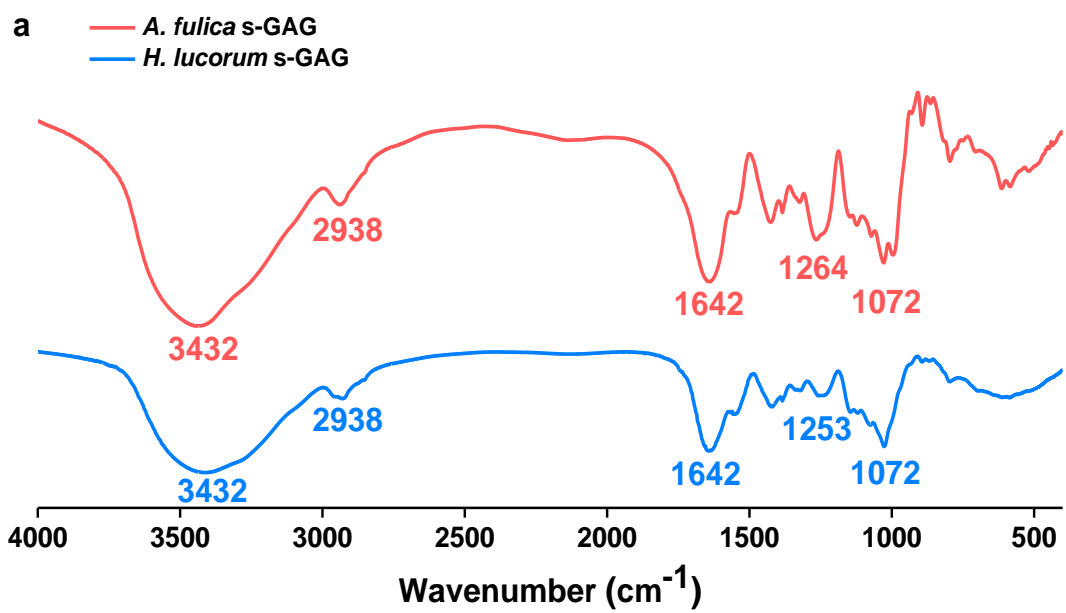

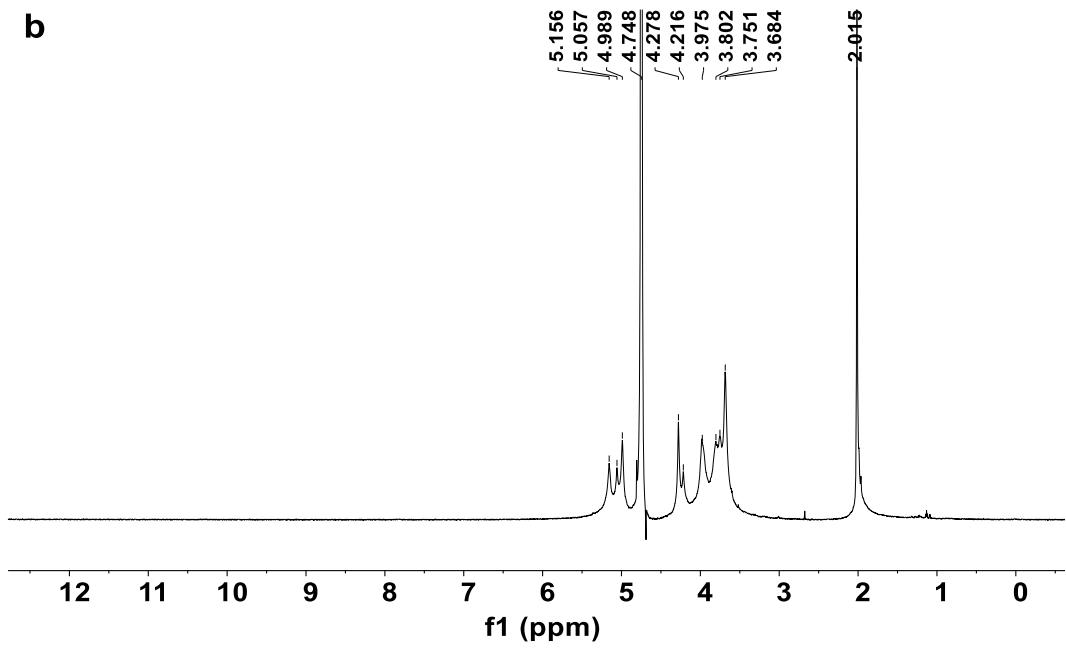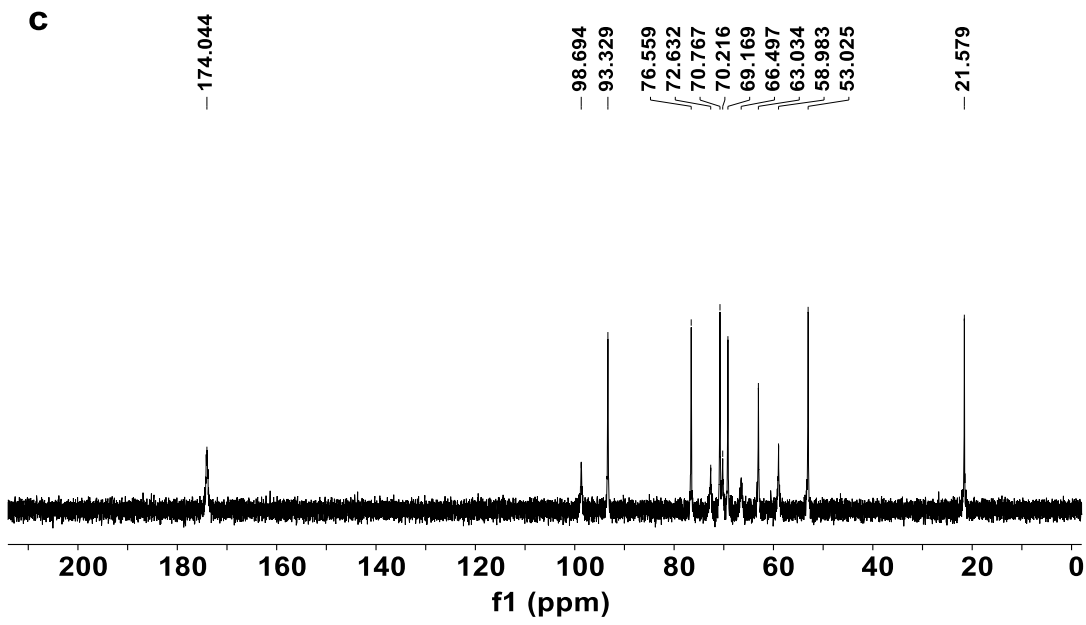



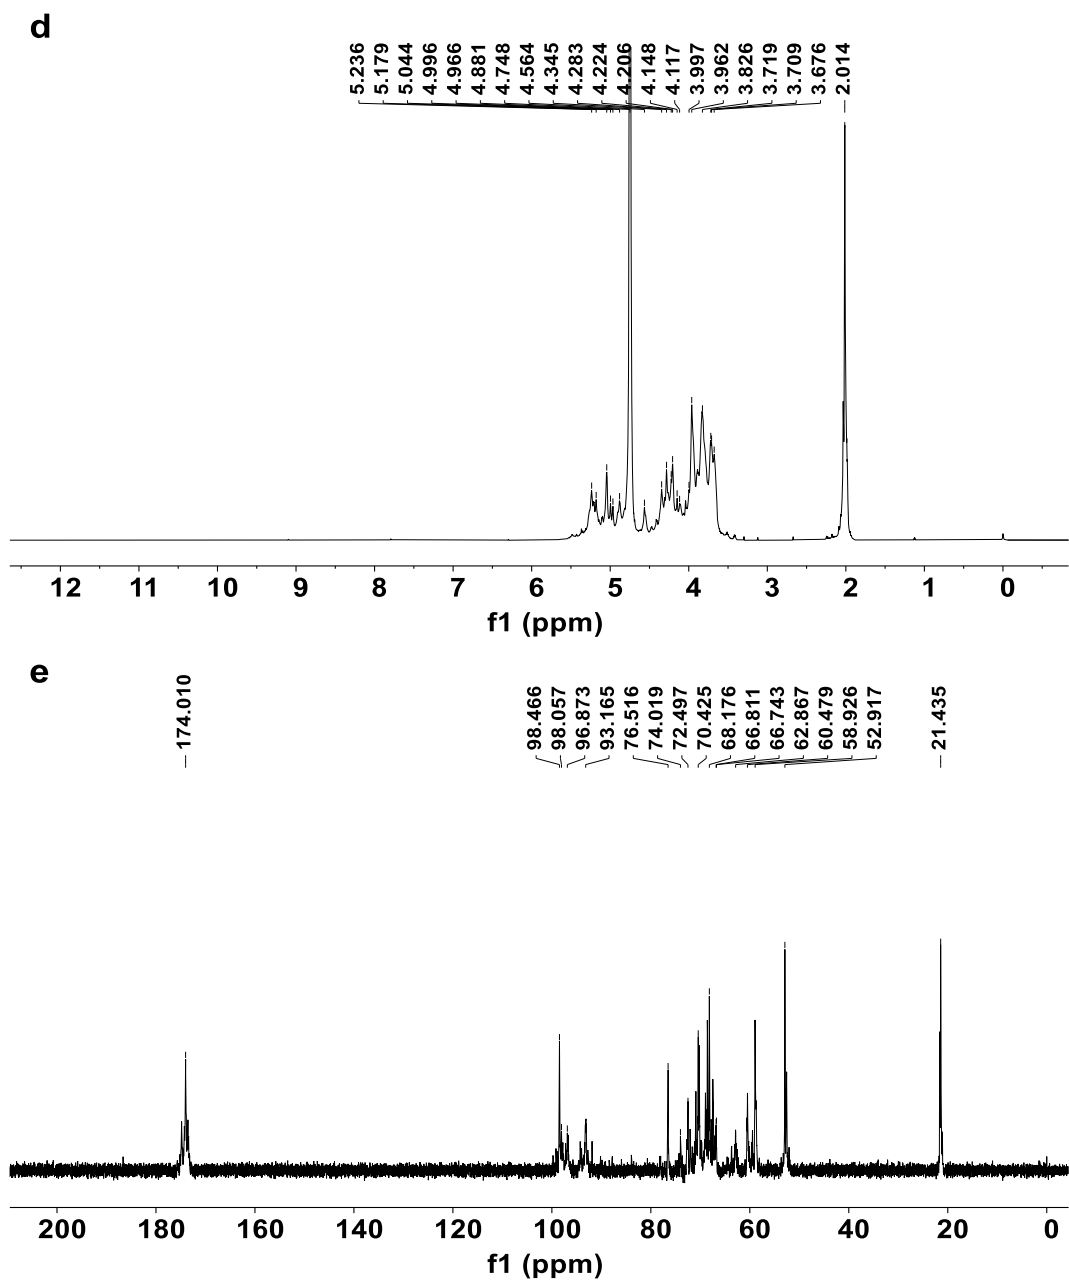

**Supplementary Fig. 3. Structure characteristics of s-GAG from two d-SMGs. a** FT-IR spectra of s-GAG. **b**  $^1\text{H}$  NMR of *A. fulica* s-GAG. **c**  $^{13}\text{C}$  NMR of *A. fulica* s-GAG. **d**  $^1\text{H}$  NMR of *H. lucorum* s-GAG. **e**  $^{13}\text{C}$  NMR of *H. lucorum* s-GAG.

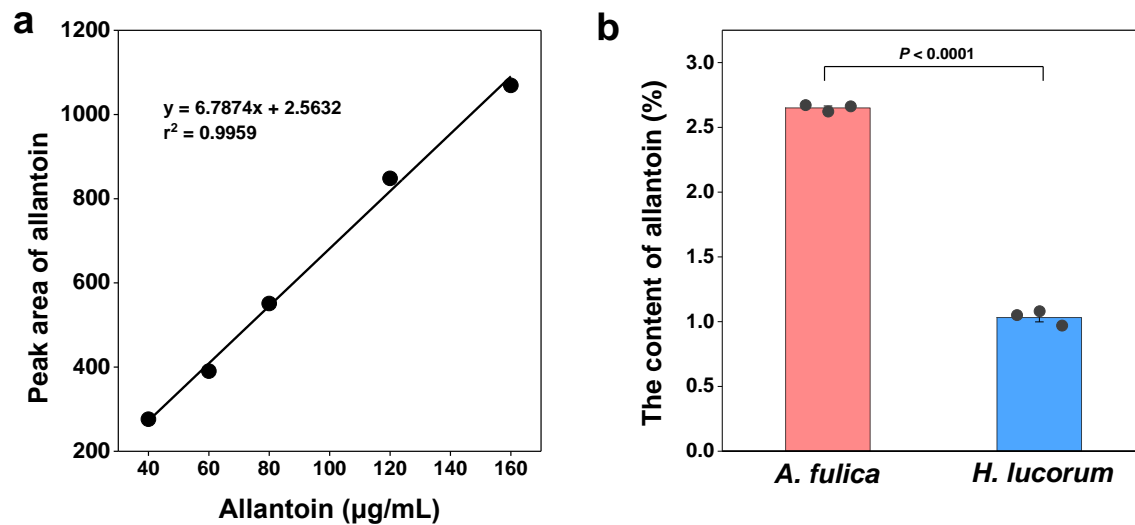

**Supplementary Fig. 4. Allantoin content in two d-SMGs.** **a** Peak area-allantoin concentration standard curve determined by HPLC. **b** The content of allantoin in two d-SMGs ( $n = 3$  biologically independent samples in each group). For **b**, two-tailed t test was used. Data are presented as mean values  $\pm$  SEM. Source data are provided as a Source data file.

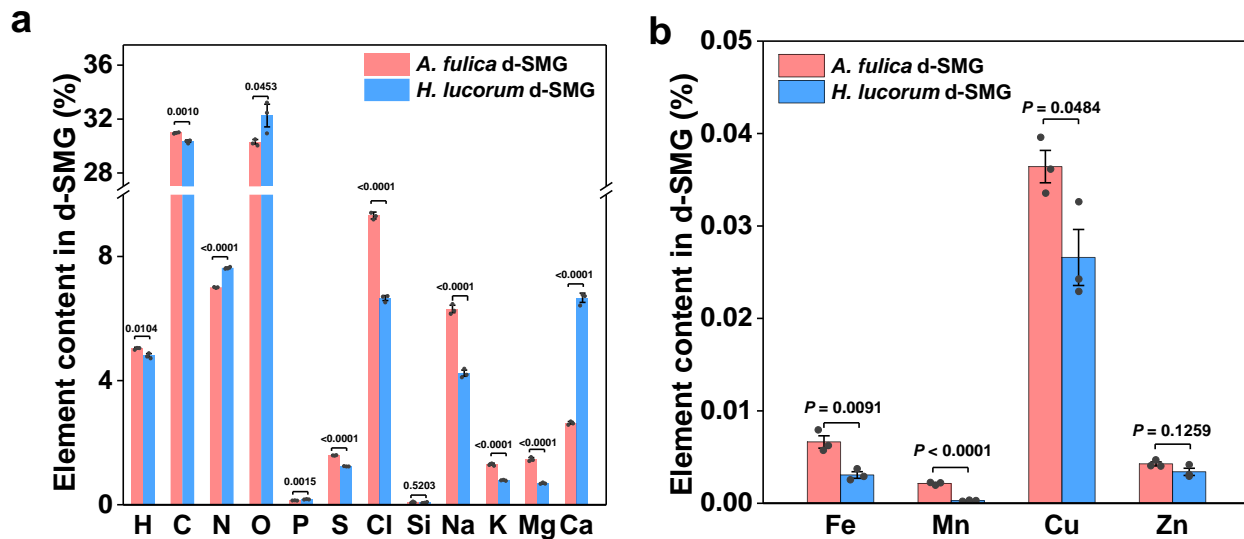

**Supplementary Fig. 5. Element content in two d-SMGs.** **a** The content of main organic elements and metallic elements in d-SMG ( $n = 3$  biologically independent samples in each group). **b** Trace amounts of metallic elements in d-SMG ( $n = 3$  biologically independent samples in each group). For **a** and **b**, two-tailed t test was used. Data are presented as mean values  $\pm$  SEM. Source data are provided as a Source data file.

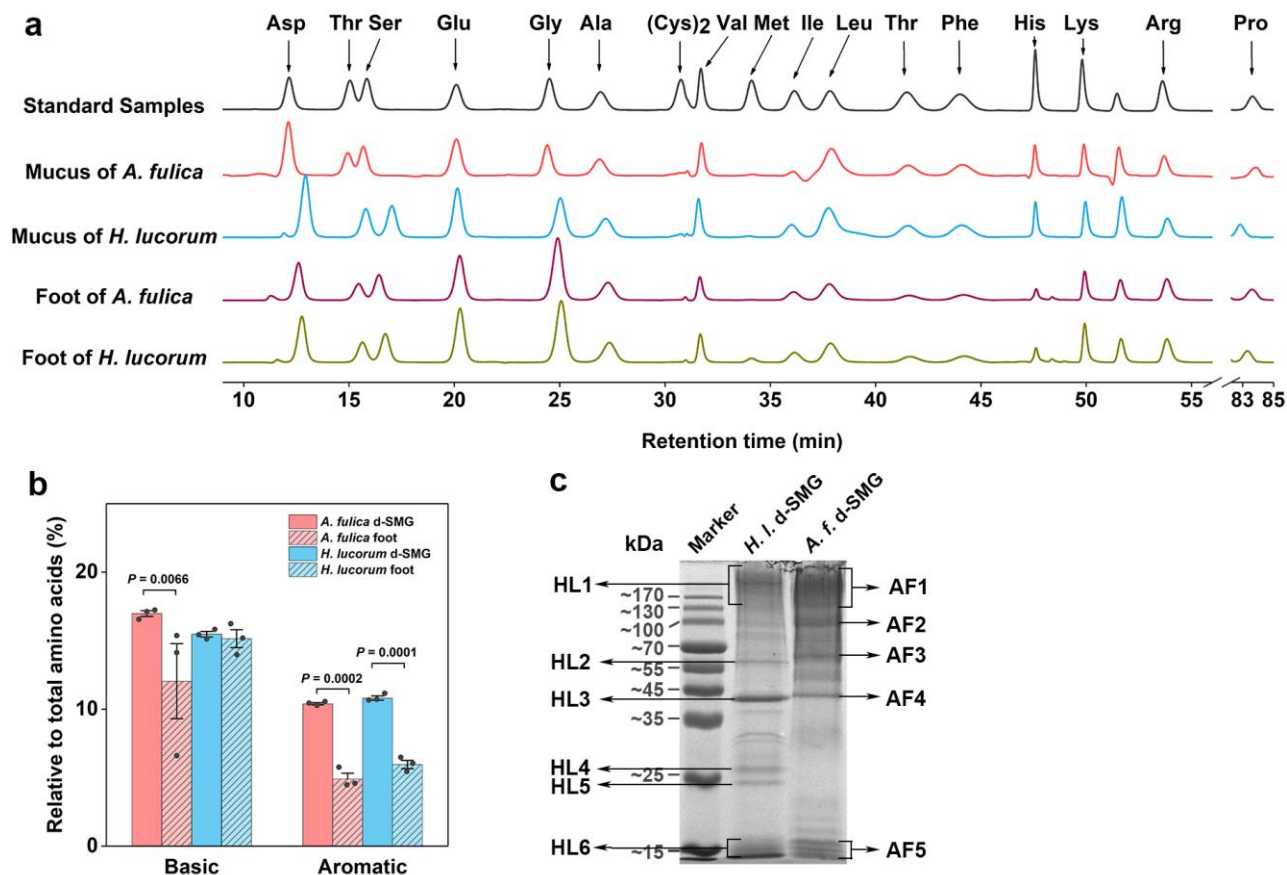

**Supplementary Fig. 6. The protein and amino acid compositions in d-SMGs.** **a** Amino acid compositions of snail mucus and foot detected by acid hydrolysis and ion chromatography assay. **b** The basic and aromatic amino acids contents in d-SMG ( $n = 3$  biologically independent samples in each group). **c** SDS-PAGE image of protein from d-SMG detected by Coomassie bright blue staining ( $n = 3$  biologically independent samples in each group). For **b**, two-tailed t test was used. Data are presented as mean values  $\pm$  SEM. Source data are provided as a Source data file.

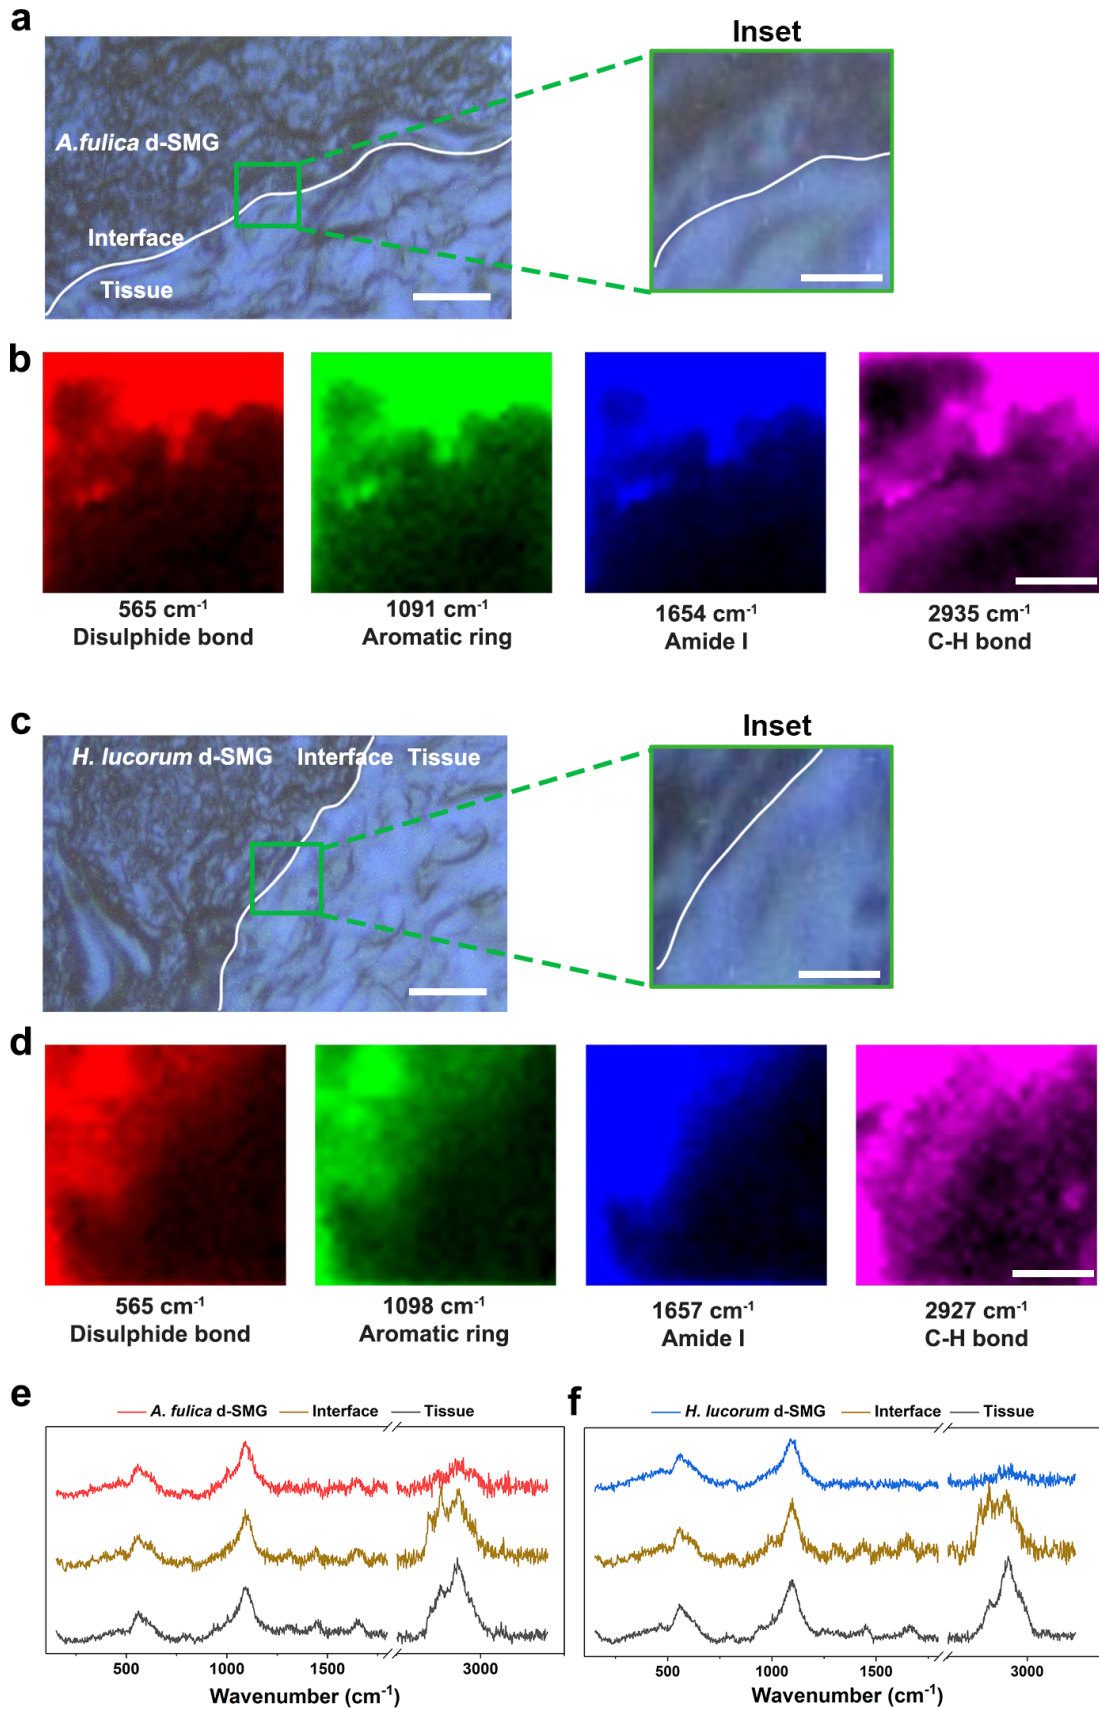

**Supplementary Fig. 7. Raman spectroscopy analysis of the interaction between d-SMG and tissue.** **a** and **c** Raman spectrum scanning area of d-SMG, interface, and tissue. **b** and **d** Raman mapping images of the d-SMG, tissue, and their interface. **e** and **f** Raman spectra of the d-SMG, tissue, and their interface. Scale bars, 2  $\mu\text{m}$  (images in **a**, **c**), 0.5  $\mu\text{m}$  (inset in **a**, **c** and images in **b**, **d**). Source data are provided as a Source data file.

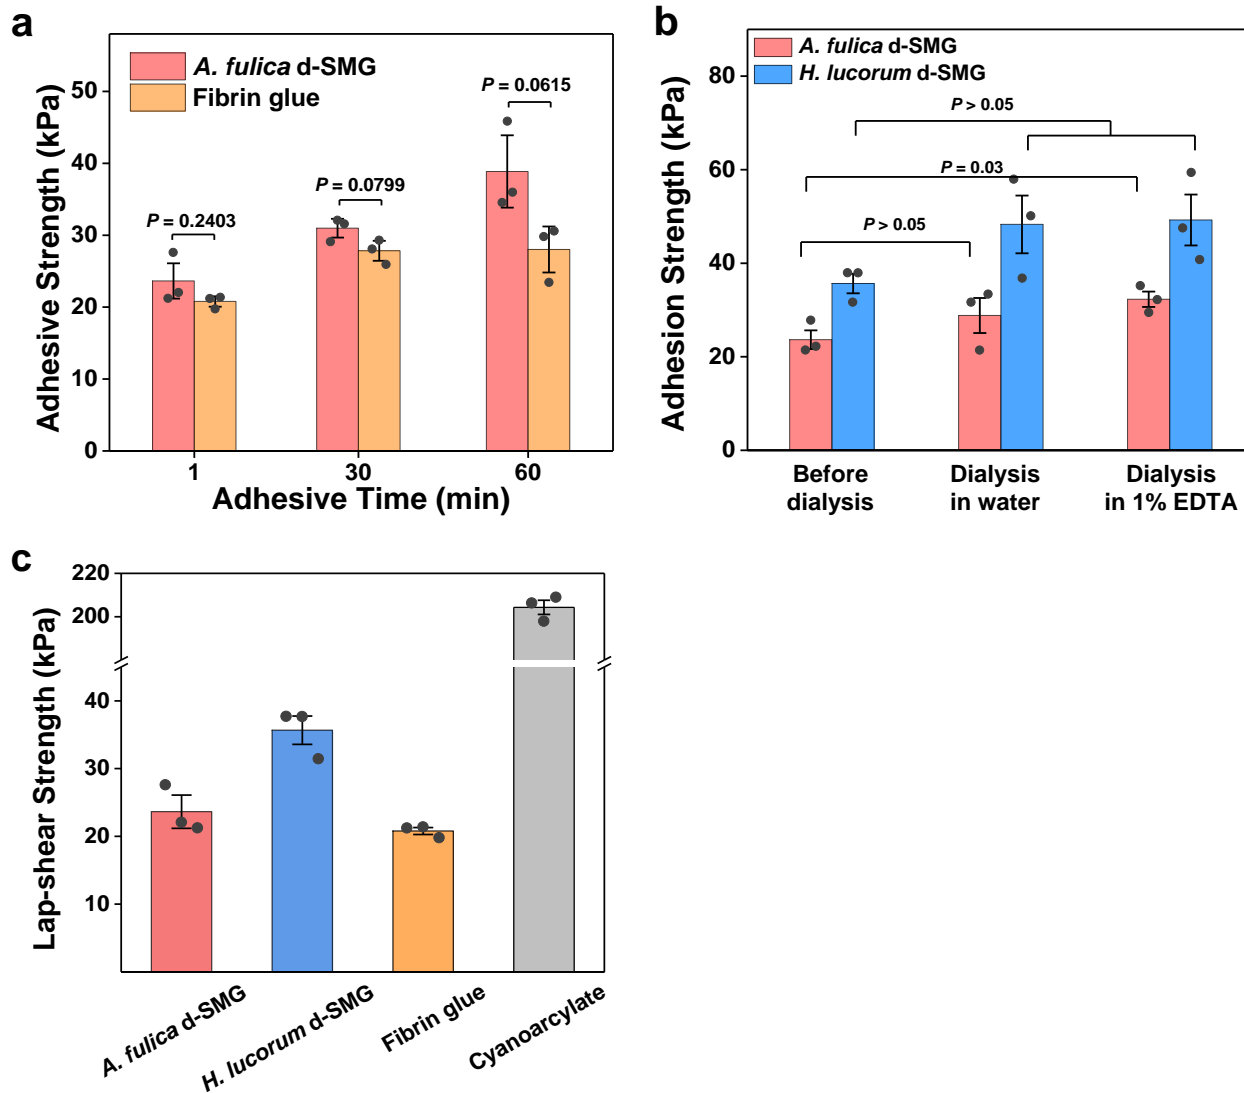

**Supplementary Fig. 8. Adhesive properties of d-SMGs.** Effects of adhesion time (**a**) and Ca<sup>2+</sup> content (**b**) on the adhesion strength of d-SMG. **c** Adhesion strength of different commercial adhesives and d-SMG. For **a–c**, two-tailed t test was used,  $n = 3$  biologically independent samples in each group. Data are presented as mean values  $\pm$  SEM. Source data are provided as a Source data file.

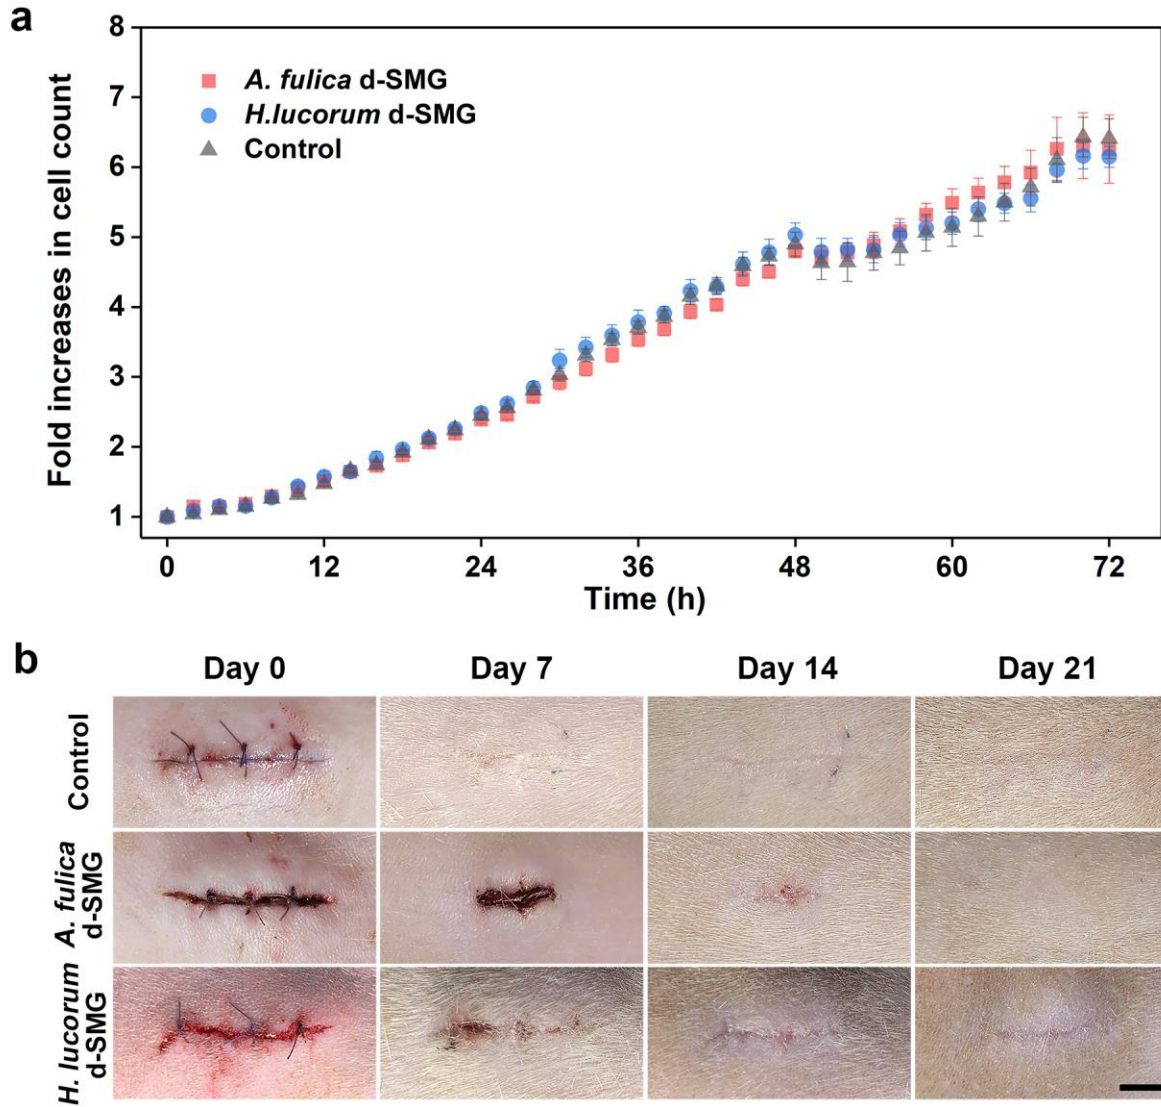

**Supplementary Fig. 9. The cytocompatibility of d-SMG.** **a** Effect of d-SMGs on the cell growth of L929. **b** Representative images of d-SMG subcutaneous implantation in rat skin. For **a**, data were expressed as mean  $\pm$  SEM,  $n = 5$ . Scale bar, 5 mm (images in **b**). Source data are provided as a Source data file.



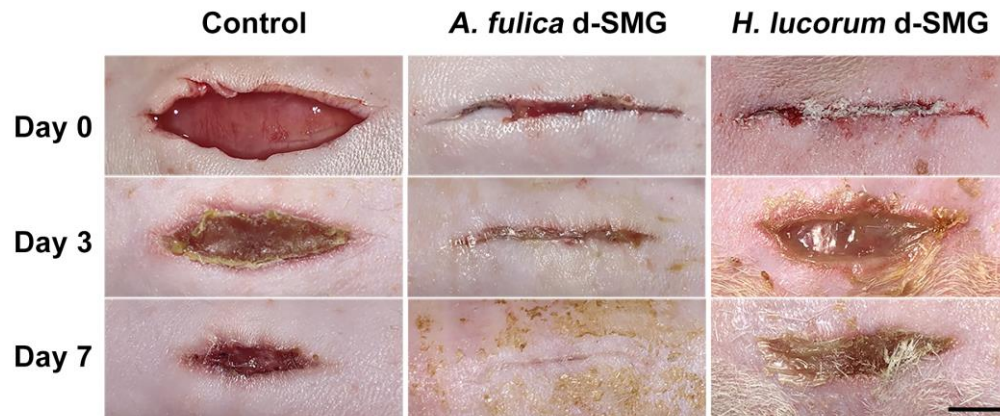

**Supplementary Fig. 10. The *in vivo* tissue adhesion effect of d-SMGs.** Representative images of rat skin incision treated with the *A. fulica* d-SMG and the *H. lucorum* d-SMG on day 0, 3, and 7. Scale bar, 5 mm.

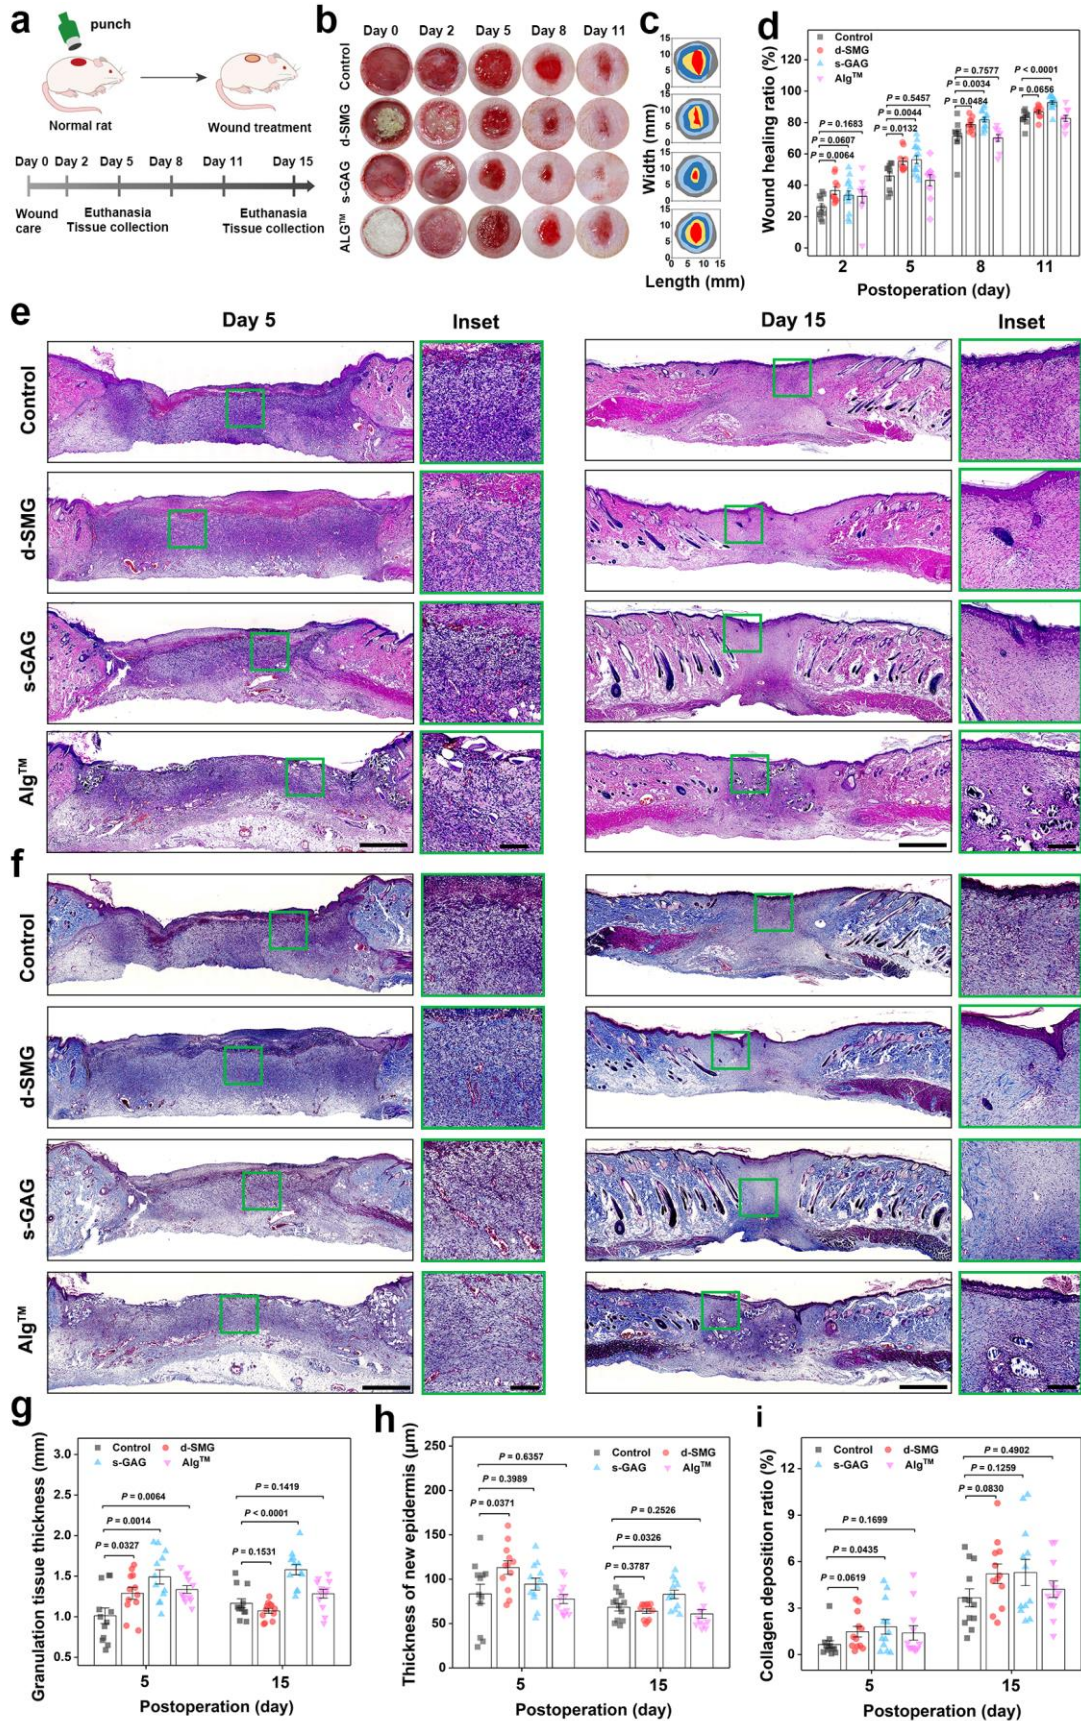

**Supplementary Fig. 11. Wound healing efficacies of *A. fulica* d-SMG in normal rats.** **a** Schematic illustration of the wound model in normal SD rats. **b** Representative images of the wound during the healing process. **c** Schematic diagram of the dynamic wound healing process. **d** The wound healing ratio after treatments ( $n = 5$  rats created over 2 independent wounds in Control, d-SMG, and Alg<sup>TM</sup> group,  $n = 7$  rats created over 2 independent wounds in s-GAG group). **e–f** H&E-staining (**e**) and Masson staining (**f**) images of the wound tissue on day 5 and 15. **g–i** Quantification of the granulation tissue thickness (**g**), neo epidermis thickness (**h**) and collagen deposition ratio (**i**) in wound tissue on day 5 and 15 ( $n = 12$  biologically independent samples in each group). For **d**, **g–i**, two-tailed t test was used. Data are presented as mean values  $\pm$  SEM. Scale bars, 1 mm (images in **e**, **f**), 200  $\mu$ m (inset in **e**, **f**). Source data are provided as a Source data file.

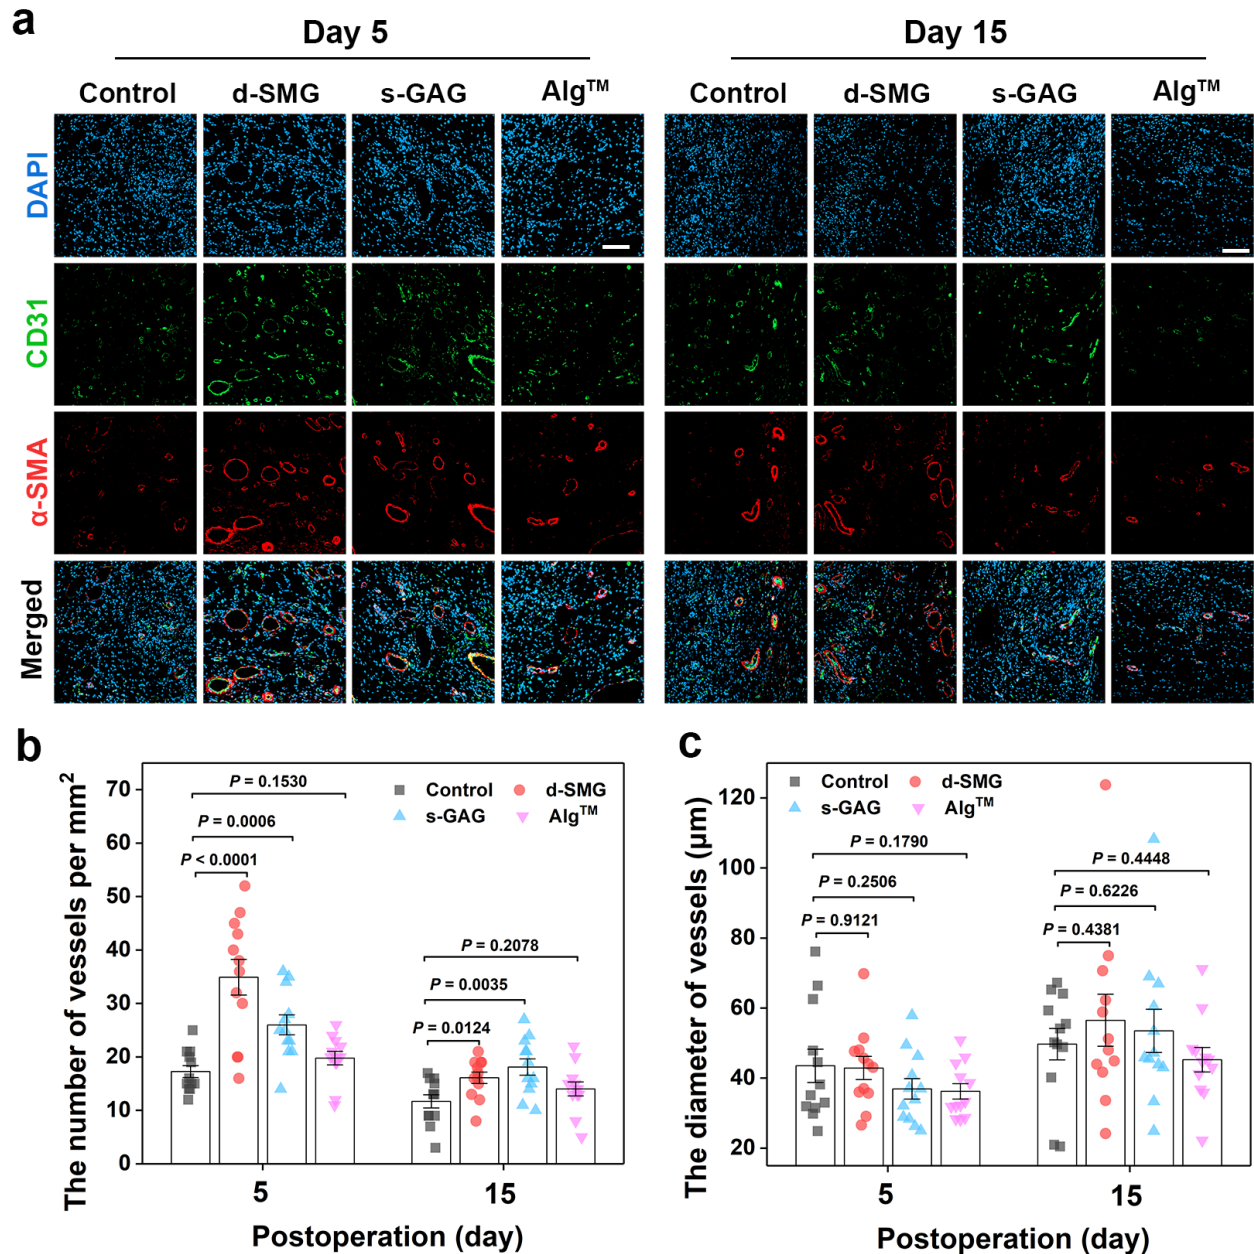

**Supplementary Fig. 12. Effects of *A. fulica* d-SMG and s-GAG on angiogenesis in normal rats. a** Representative immunostaining images of CD31 and  $\alpha$ -SMA in the wound tissue. **b** Quantification of the number of vessels in the wound tissue ( $n = 12$  biologically independent samples in each group). **c** Quantification of the diameter of vessels in the wound tissue ( $n = 12$  biologically independent samples in each group). For **b** and **c**, two-tailed t test was used. Data are presented as mean values  $\pm$  SEM. Scale bar, 100  $\mu$ m (images in **a**). Source data are provided as a Source data file.

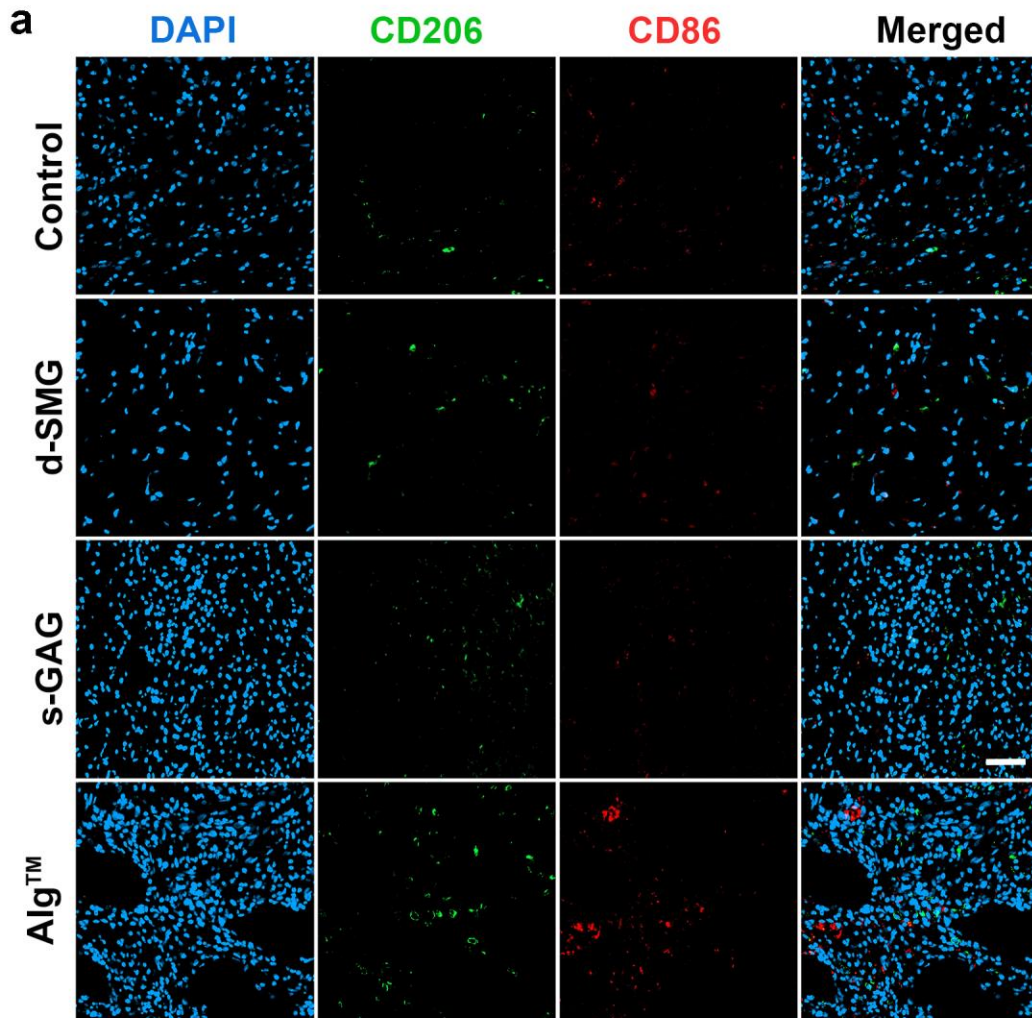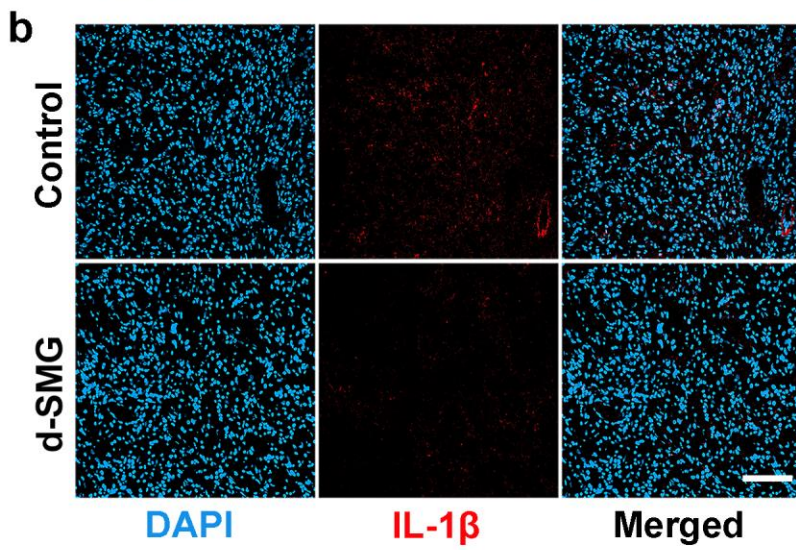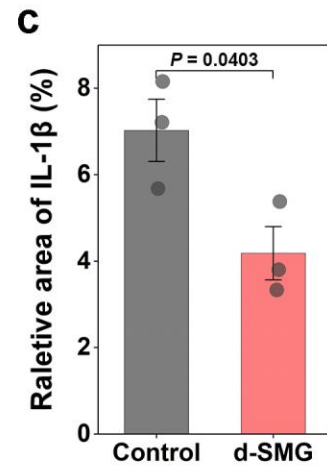

**Supplementary Fig. 13. Effects of *A. fulica* d-SMG on macrophage polarization and inflammation.** **a** Representative immunostaining image of CD206 and CD86 in wound tissue on day 14. **b** Representative immunostaining image of IL-1 $\beta$  in wound tissue on day 7. **c** Quantification of the IL-1 $\beta$  positive area in the wound tissue on day 7 ( $n = 3$  biologically independent samples in each group). For **c**, two-tailed t test was used. Data are presented as mean values  $\pm$  SEM. Scale bar, 50  $\mu$ m (images in **a**), 100  $\mu$ m (images in **b**). Source data are provided as a Source data file.

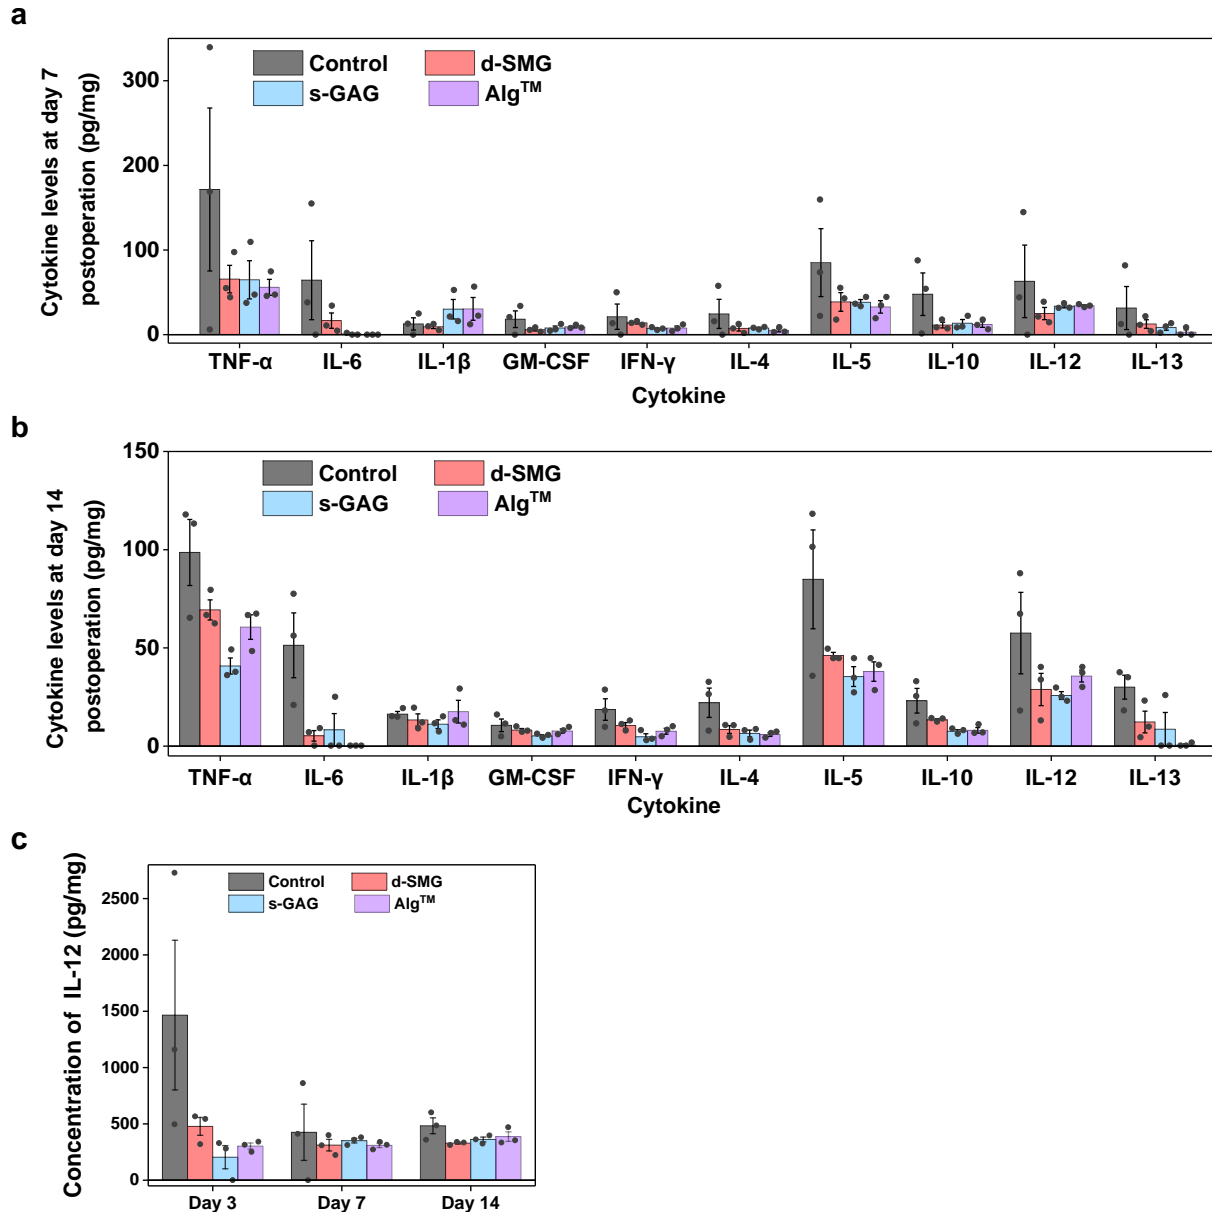

**Supplementary Fig. 14. Effects of *A. fulica* d-SMG and s-GAG on cytokine levels of wound tissue.** Cytokine levels in diabetic wound tissue on day 7 (a) and 14 (b) detected by bio-plex assay ( $n = 3$  biologically independent samples in each group). c Concentration of IL-2 in diabetic wound tissue on day 3, 7, and 14 ( $n = 3$  biologically independent samples in each group). For a-c, Data are presented as mean values  $\pm$  SEM. Source data are provided as a Source data file.

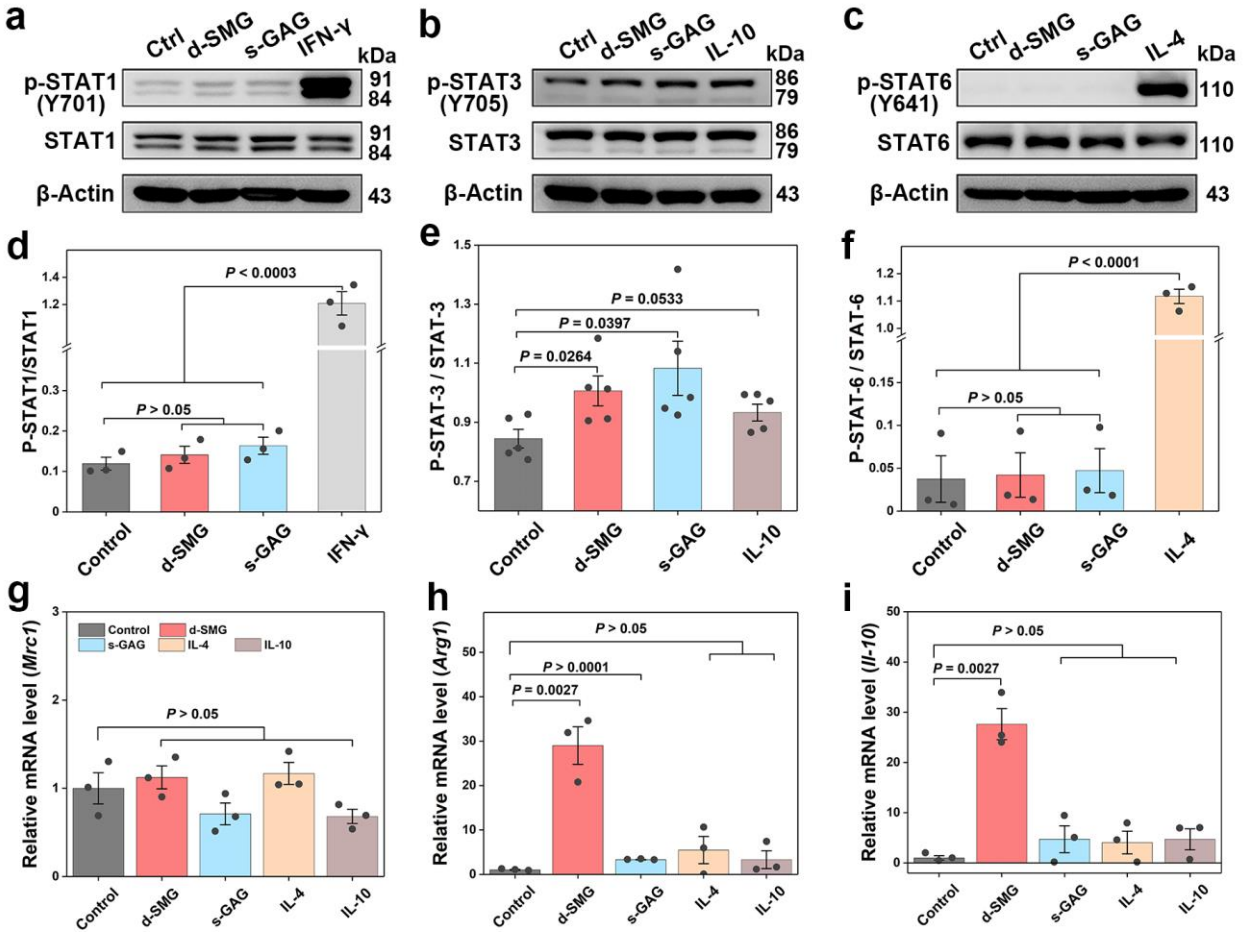

**Supplementary Fig. 15. Effects of *A. fulica* d-SMG and s-GAG on inflammatory regulation of macrophages *in vitro*.** **a–c** The protein levels of p-STAT-1 (Y701), p-STAT-3 (Y705), and p-STAT-6 (Y641) in RAW264.7 treated by d-SMG (0.2 mg/mL), s-GAG (0.15 mg/mL), IFN- $\gamma$  (10 ng/mL), IL-10 (20 ng/mL), and IL-4 (5 ng/mL), assessed by western blot. The phosphorylation or total-protein levels of STAT1, STAT3, and STAT6 were obtained through different gels, because they have the same position on the gel and they cannot be displayed separately. The samples derive from the same experiment and that gels/blots were processed in parallel. **d–f** Relative density of p-STAT-1/STAT-1 ( $n = 3$  biologically independent samples in each group), p-STAT-3/STAT-3 ( $n = 5$  biologically independent samples in each group), and p-STAT-6/STAT-6 ( $n = 3$  biologically independent samples in each group) from western blot images. **g–i** Relative mRNA level in macrophages assessed using real-time PCR ( $n = 3$  biologically independent samples in each group). For **d–i**, two-tailed t test was used. Data are presented as mean values  $\pm$  SEM. Source data are provided as a Source data file.



**a**

**s-GAG**

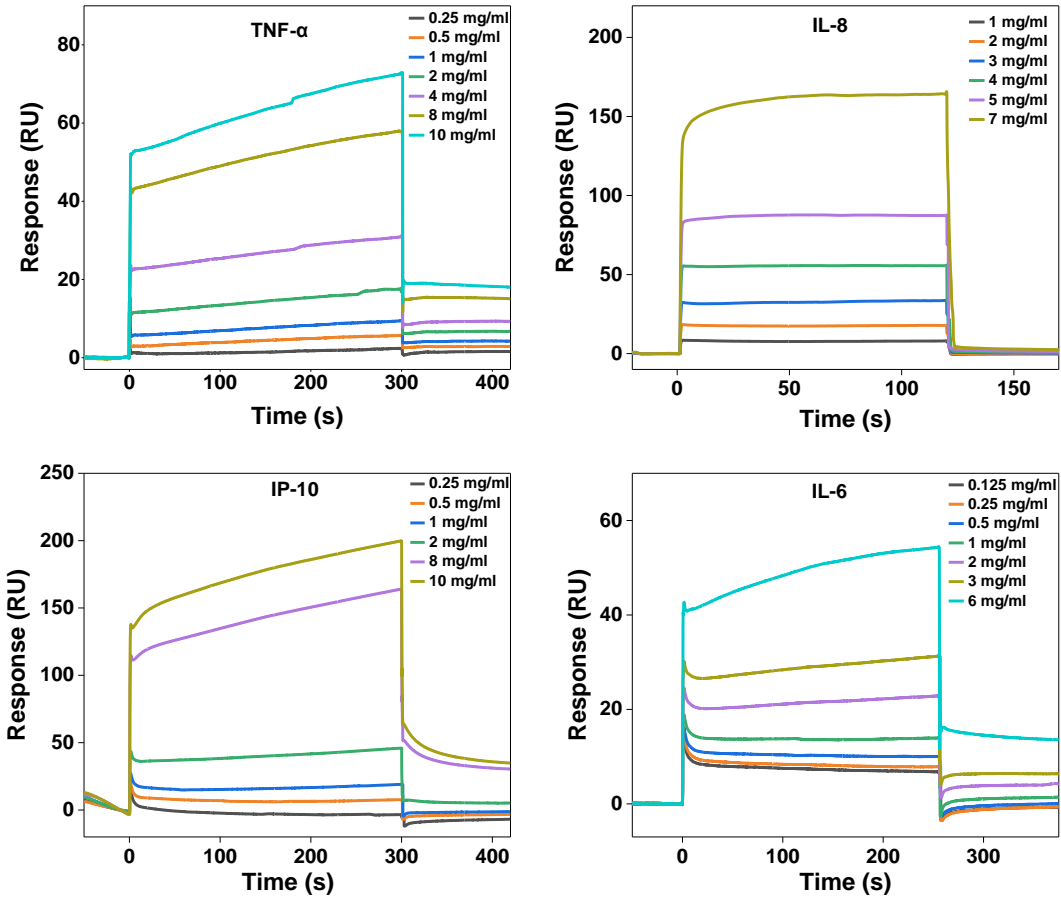

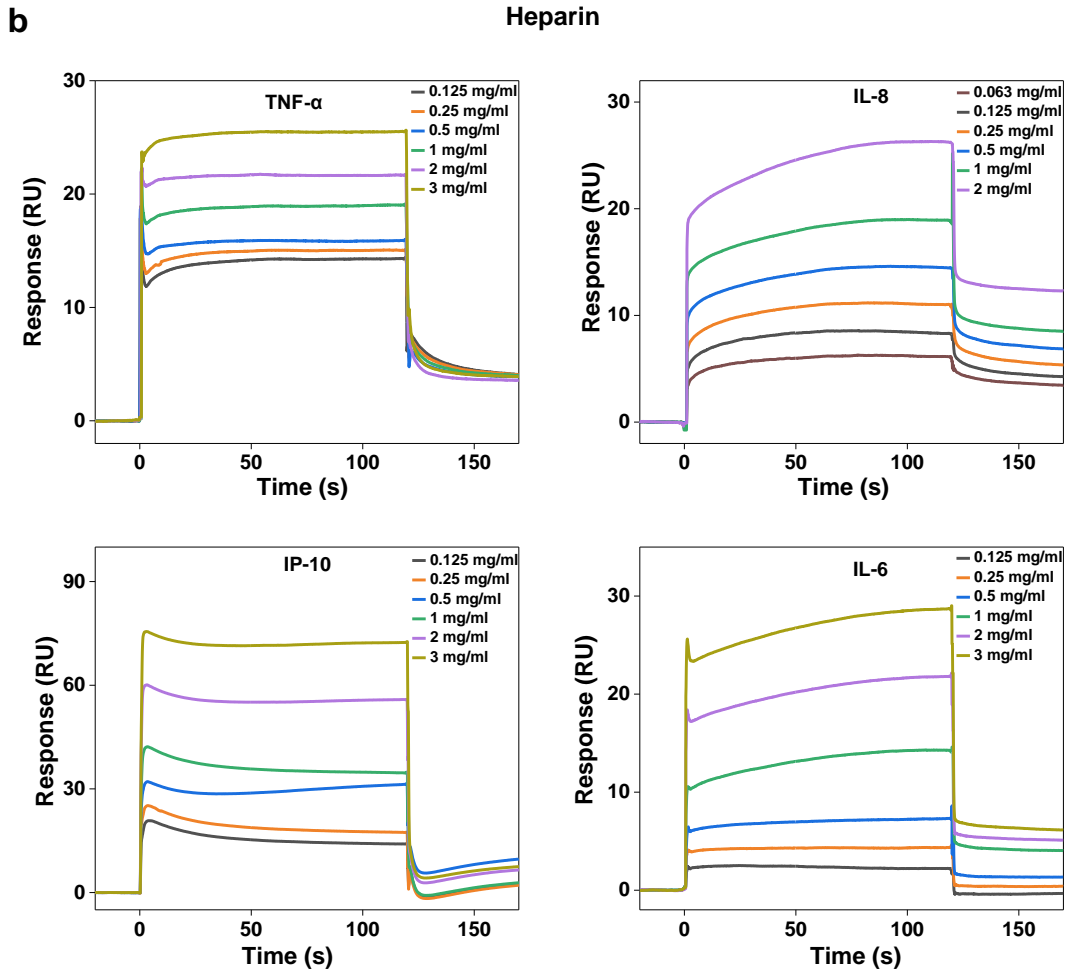

**c** **The affinity of s-GAG and heparin to cytokines ( $\mu\text{M}$ )**

| GAG     | TNF- $\alpha$ | IP-10 | IL-8  | IL-6  |
|---------|---------------|-------|-------|-------|
| s-GAG   | 0.336         | 0.075 | 0.012 | 0.171 |
| Heparin | 0.233         | 0.252 | 0.170 | 0.609 |

**Supplementary Fig. 16. Binding ability of s-GAG to inflammatory cytokines.** The association and dissociation dynamic curves of s-GAG (a) and heparin (b) binding to immobilized cytokines, detected by SPR technology. c The affinity of s-GAG or heparin to cytokines. Source data are provided as a Source data file.

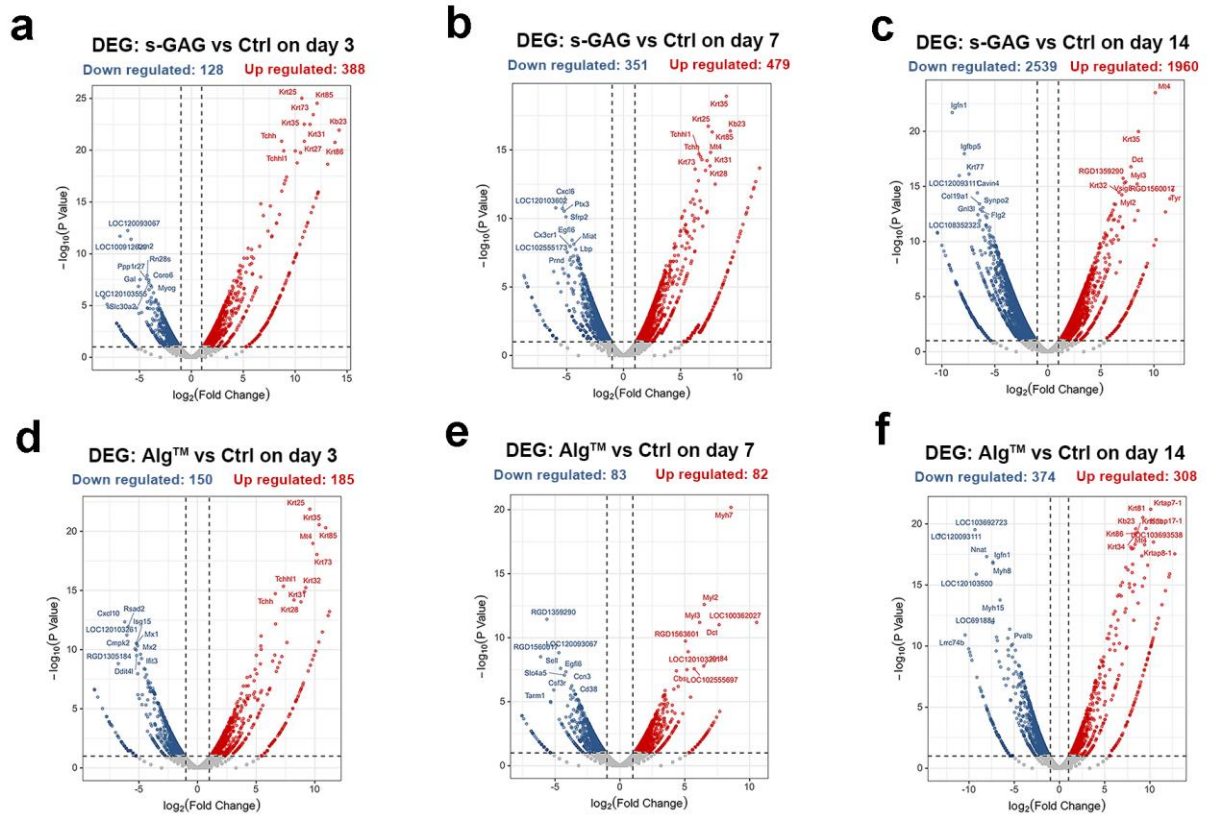

Group: ● Down-regulated ● not-significant ● Up-regulated

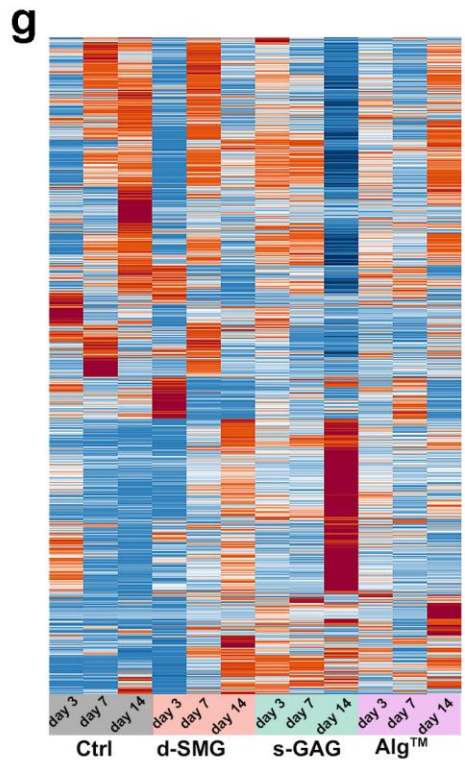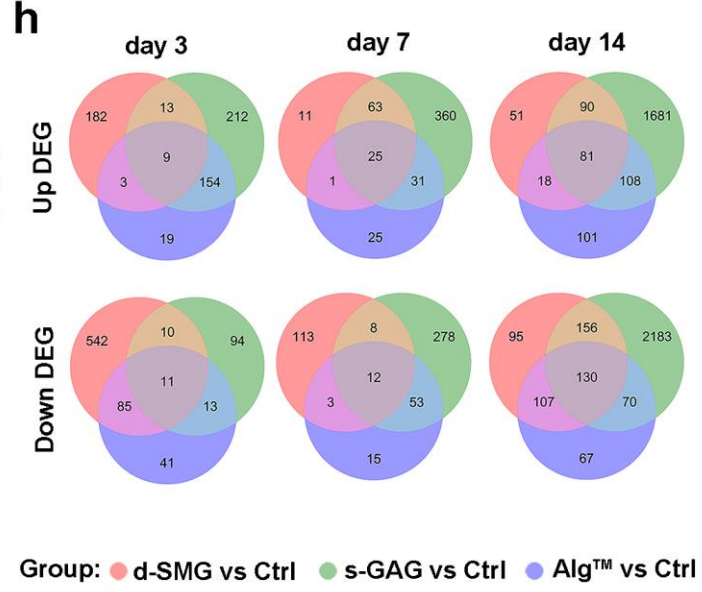

**Supplementary Fig. 17. Effects of *A. fulica* d-SMG and s-GAG on gene expression in diabetic wound tissue.** **a–c** Volcano plots of the upregulated and downregulated genes in wound tissue after s-GAG treatment for 3 (**a**), 7 (**b**), and 14 (**c**) days. **d–f** Volcano plots of the upregulated and downregulated genes in wound tissue after Alg<sup>TM</sup> treatment for 3 (**d**), 7 (**e**), and 14 (**f**) days. **g** Heat map of the differentially expressed genes (DEGs) in the wound tissue (FDR < 0.05). **h** Venn diagram of the upregulated and downregulated genes in wound tissue after treatment. For **a–f**, Wald test was used. Source data are provided as a Source data file.

**Supplementary Table 1.** Structural characteristics of s-GAG from d-SMG

| s-GAG                   | Composition             | -OSO <sub>3</sub> <sup>-</sup><br>(%) | Molecular weight (kDa) |                      |                                                     |
|-------------------------|-------------------------|---------------------------------------|------------------------|----------------------|-----------------------------------------------------|
|                         |                         |                                       | <i>M<sub>w</sub></i>   | <i>M<sub>n</sub></i> | PDI ( <i>M<sub>w</sub></i> / <i>M<sub>n</sub></i> ) |
| <i>A. fulica</i> d-SMG  | IdoA, GlcNAc            | 15.4                                  | 696.7                  | 540.7                | 1.29                                                |
| <i>H. lucorum</i> d-SMG | IdoA, GlcNAc, GlcA, Gal | 13.6                                  | 900.0                  | 725.8                | 1.24                                                |

**Supplementary Table 2.** Amino acid composition and content of snail mucus and foot (Mean values ± SEM)

| Amino acids        | <i>A. fulica</i> (mg/g) |               | <i>H. lucorum</i> (mg/g) |               |
|--------------------|-------------------------|---------------|--------------------------|---------------|
|                    | Mucus                   | Foot          | Mucus                    | Foot          |
| Asp                | 43.5 ± 1.98             | 69.2 ± 3.82   | 58.5 ± 0.40              | 75.0 ± 8.45   |
| Thr                | 17.8 ± 0.61             | 27.8 ± 1.89   | 27.0 ± 0.10              | 31.0 ± 3.95   |
| Ser                | 19.2 ± 0.80             | 41.3 ± 1.71   | 26.2 ± 0.30              | 39.5 ± 4.81   |
| Glu                | 40.8 ± 1.66             | 125.1 ± 7.35  | 57.3 ± 0.67              | 118.9 ± 13.03 |
| Gly                | 13.7 ± 0.22             | 109.4 ± 13.98 | 25.7 ± 0.20              | 82.2 ± 14.71  |
| Ala                | 16.0 ± 0.51             | 46.0 ± 2.77   | 22.9 ± 0.07              | 41.9 ± 4.36   |
| (Cys) <sub>2</sub> | 4.0 ± 0.44              | 4.8 ± 1.19    | 7.2 ± 2.48               | 3.4 ± 1.88    |
| Val                | 31.6 ± 11.03            | 30.0 ± 1.87   | 27.0 ± 0.48              | 31.7 ± 3.80   |
| Met                | 0.6 ± 0.43              | 0.3 ± 0.30    | 1.7 ± 0.25               | 7.9 ± 0.31    |
| Ile                | 15.3 ± 0.31             | 22.3 ± 1.58   | 19.2 ± 0.36              | 24.0 ± 2.79   |
| Leu                | 27.5 ± 3.53             | 49.6 ± 4.25   | 43.3 ± 3.40              | 49.4 ± 7.24   |
| Tyr                | 12.6 ± 0.28             | 12.9 ± 1.08   | 19.1 ± 0.39              | 16.8 ± 1.47   |
| Phe                | 22.8 ± 1.73             | 21.9 ± 1.68   | 30.6 ± 0.18              | 24.6 ± 3.50   |
| His                | 16.7 ± 1.52             | 10.5 ± 1.22   | 20.7 ± 0.25              | 11.7 ± 1.62   |
| Lys                | 18.2 ± 0.69             | 24.0 ± 9.60   | 24.2 ± 0.20              | 37.2 ± 4.79   |
| Arg                | 22.9 ± 0.90             | 52.8 ± 11.75  | 26.3 ± 0.42              | 56.4 ± 5.96   |
| Pro                | 17.4 ± 2.79             | 63.8 ± 6.36   | 23.4 ± 1.30              | 45.2 ± 7.71   |

**Supplementary Table 3.** Identified proteins (top 95%) in the *A. fulica* d-SMG by LC-MS/MS.

| Protein IDs<br>(Uniprot) | Protein                              | Organism                   | Unique<br>peptides | Unique<br>sequence<br>coverage | Protein<br>abundance |
|--------------------------|--------------------------------------|----------------------------|--------------------|--------------------------------|----------------------|
| A0A3G2VHN3               | Hemocyanin $\beta$                   | <i>Cornu aspersum</i>      | 4                  | 0.9 %                          | 41.68 %              |
| A0A0B7BT89               | Uncharacterized                      | <i>Arion vulgari</i>       | 8                  | 3.7 %                          | 8.24 %               |
| A0A3G2VHF1               | Hemocyanin $\alpha$ N                | <i>Cornu aspersum</i>      | 5                  | 1.7 %                          | 6.74 %               |
| A0A3G2VFW4               | Hemocyanin $\alpha$ N                | <i>Helix pomatia</i>       | 2                  | 0.9 %                          | 6.14 %               |
| A0A3G2VFQ5               | Hemocyanin $\alpha$ D                | <i>Cornu aspersum</i>      | 2                  | 0.4 %                          | 4.44 %               |
| A0A0B7A203               | Uncharacterized                      | <i>Arion vulgaris</i>      | 1                  | 15.3 %                         | 4.10 %               |
| P35903                   | Achacin                              | <i>Lissachatina fulica</i> | 28                 | 44.8 %                         | 3.65 %               |
| A0A3G2VHT2               | Hemocyanin $\beta$                   | <i>Helix pomatia</i>       | 1                  | 0.4 %                          | 3.54 %               |
| A0A0B7A0D2               | Uncharacterized                      | <i>Arion vulgaris</i>      | 2                  | 3.7 %                          | 3.41 %               |
| A0A0B7BCN0               | Uncharacterized                      | <i>Arion vulgaris</i>      | 1                  | 3.3 %                          | 2.29 %               |
| A0A0B7AFX7               | Uncharacterized                      | <i>Arion vulgaris</i>      | 1                  | 2.7 %                          | 2.14 %               |
| A0A0B7APA2               | Uncharacterized                      | <i>Arion vulgaris</i>      | 1                  | 2.9 %                          | 2.06 %               |
| A0A0B6ZQQ7               | Haemocyan_bet_s<br>domain-containing | <i>Arion vulgaris</i>      | 1                  | 12.2 %                         | 1.91 %               |
| A0A0B7A255               | Uncharacterized                      | <i>Arion vulgaris</i>      | 2                  | 7.1 %                          | 1.28 %               |
| A0A345S6Z0               | Actin, cytoplasmic                   | <i>Cepaea nemoralis</i>    | 13                 | 38.8 %                         | 1.18 %               |
| A0A0B7AHS6               | APH domain-<br>containing            | <i>Arion vulgaris</i>      | 1                  | 3.3 %                          | 1.00 %               |
| A0A0B6YGU9               | Uncharacterized                      | <i>Arion vulgaris</i>      | 1                  | 28.2 %                         | 0.98 %               |
| A0A0B7B9A6               | Uncharacterized                      | <i>Arion vulgaris</i>      | 1                  | 3.4 %                          | 0.67 %               |

**Supplementary Table 4.** Identified proteins (top 99%) in the *H. lucorum* d-SMG by LC-MS/MS.

| Protein IDs<br>(Uniprot) | Protein                                    | Organism                | Unique<br>peptides | Unique<br>sequence<br>coverage | Protein<br>abundance |
|--------------------------|--------------------------------------------|-------------------------|--------------------|--------------------------------|----------------------|
| G3FPE6                   | Hemocyanin $\alpha$ D-subunit              | <i>Helix lucorum</i>    | 26                 | 7.9 %                          | 37.14 %              |
| G3FPE5                   | Hemocyanin $\beta$ -subunit                | <i>Helix lucorum</i>    | 46                 | 18.4 %                         | 28.18 %              |
| G3FPE7                   | Hemocyanin $\alpha$ N-subunit              | <i>Helix lucorum</i>    | 36                 | 18.1 %                         | 23.58 %              |
| A0A3G2VFW4               | Hemocyanin $\alpha$ N                      | <i>Helix pomatia</i>    | 16                 | 5.9 %                          | 3.43 %               |
| A0A3G2VHT2               | Hemocyanin $\beta$                         | <i>Helix pomatia</i>    | 18                 | 8.0 %                          | 2.96 %               |
| A0A3G2VHR9               | Hemocyanin $\alpha$ D                      | <i>Helix pomatia</i>    | 13                 | 3.4 %                          | 1.93 %               |
| A0A3G2VHF1               | Hemocyanin $\alpha$ N                      | <i>Cornu aspersum</i>   | 8                  | 3.8 %                          | 0.99 %               |
| A0A3G2VFAQ5              | Hemocyanin $\alpha$ D                      | <i>Cornu aspersum</i>   | 13                 | 3.9 %                          | 0.68 %               |
| A0A0B7AMR8               | Uncharacterized                            | <i>Arion vulgaris</i>   | 3                  | 4.4 %                          | 0.64 %               |
| A0A3G2VHN3               | Hemocyanin $\beta$                         | <i>Cornu aspersum</i>   | 15                 | 5.6 %                          | 0.16 %               |
| A0A0B7B0J4               | Uncharacterized                            | <i>Arion vulgaris</i>   | 2                  | 4.0 %                          | 0.09 %               |
| A0A345S6Z0               | Actin, cytoplasmic                         | <i>Cepaea nemoralis</i> | 3                  | 14.6 %                         | 0.06 %               |
| A0A0B6ZIIY0              | PKS_ER domain-containing                   | <i>Arion vulgaris</i>   | 2                  | 7.7 %                          | 0.02 %               |
| A0A345S6Y9               | Tubulin $\alpha$ chain                     | <i>Cepaea nemoralis</i> | 3                  | 10.0 %                         | 0.02 %               |
| A0A0B7C4D3               | Tyrosinase_Cu-bd domain-<br>containing     | <i>Arion vulgaris</i>   | 1                  | 18.6 %                         | 0.02 %               |
| A0A0B7A345               | Phosphoenolpyruvate<br>carboxykinase (GTP) | <i>Arion vulgaris</i>   | 1                  | 2.9 %                          | 0.01 %               |
| A0A0B7B670               | Tubulin $\beta$ chain                      | <i>Arion vulgaris</i>   | 1                  | 4.0 %                          | 0.01 %               |
| P00994                   | Isoinhibitor K                             | <i>Helix pomatia</i>    | 1                  | 24.1 %                         | 0.01 %               |

**Supplementary Table 5.** Identified mucins in the *A. fulica* d-SMG by LC-MS/MS.

| Protein IDs<br>(Uniprot) | Protein                  | Organism                     | Unique peptides | Unique sequence coverage | Protein abundance |
|--------------------------|--------------------------|------------------------------|-----------------|--------------------------|-------------------|
| A0A2C9JYP9               | Mucin-2-like             | <i>Biomphalaria glabrata</i> | 1               | 3.4%                     | 70.67%            |
| A0A433TRR6               | Mucin 96d                | <i>Elysia chlorotica</i>     | 1               | 16.1%                    | 12.40%            |
| A0A2T7PKE9               | Mucin-2-like             | <i>Pomacea canaliculata</i>  | 4               | 14.8%                    | 9.15%             |
| A0A2T7PBD6               | Mucin-2-like             | <i>Pomacea canaliculata</i>  | 1               | 2.8%                     | 5.69%             |
| A0A2C9L226               | Mucin-like protein       | <i>Biomphalaria glabrata</i> | 1               | 3.7%                     | 1.25%             |
| A0A3S0ZR63               | Conserved secreted mucin | <i>Elysia chlorotica</i>     | 2               | 3.7%                     | 0.85%             |

**Supplementary Table 6.** Identified mucins in the *H. lucorum* d-SMG by LC-MS/MS.

| Protein IDs<br>(Uniprot) | Protein            | Organism                     | Unique peptides | Unique sequence coverage | Protein abundance |
|--------------------------|--------------------|------------------------------|-----------------|--------------------------|-------------------|
| A0A2T7NL50               | Mucin-2-like       | <i>Pomacea canaliculata</i>  | 1               | 0.6%                     | 70.12%            |
| A0A0B6ZJM7               | Mucin-5AC          | <i>Arion vulgaris</i>        | 2               | 1.3%                     | 7.98%             |
| A0A2T7NM56               | Mucin-5AC-like     | <i>Pomacea canaliculata</i>  | 1               | 3%                       | 7.51%             |
| A0A0B6ZSG9               | Mucin-5AC-like     | <i>Arion vulgaris</i>        | 1               | 0.9%                     | 3.70%             |
| A0A2C9LWW2               | Mucin-1            | <i>Biomphalaria glabrata</i> | 1               | 3.1%                     | 2.75%             |
| A0A2T7PRF9               | Mucin-like protein | <i>Pomacea canaliculata</i>  | 2               | 1.9%                     | 1.87%             |
| V4AEI7                   | Mucin 5B           | <i>Lottia gigantea</i>       | 1               | 13.2%                    | 1.74%             |
| A0A2T7PR58               | Mucin-like protein | <i>Pomacea canaliculata</i>  | 1               | 0.7%                     | 1.72%             |
| A0A2C9KEQ3               | Mucin-13           | <i>Biomphalaria glabrata</i> | 1               | 4.2%                     | 1.41%             |
| A0A2T7PHX2               | Mucin-5AC-like     | <i>Pomacea canaliculata</i>  | 2               | 2.8%                     | 1.21%             |



**Supplementary Table 7.** Identified proteins in the SDS-PAGE of *A. fulica* d-SMG by LC-MS/MS.

| SDS-PAGE Fractions        | Protein ID (Uniprot) | Protein                       | Organism                      | Unique peptides | Unique sequence coverage | Protein abundance |
|---------------------------|----------------------|-------------------------------|-------------------------------|-----------------|--------------------------|-------------------|
| <b>AF1</b><br>(> 130 kDa) | A0A3G2VHN3           | Hemocyanin $\beta$            | <i>Cornu aspersum</i>         | 6               | 1.9 %                    | 38.31 %           |
|                           | A0A3G2VHF1           | Hemocyanin $\alpha$ N         | <i>Cornu aspersum</i>         | 5               | 1.7 %                    | 9.56 %            |
|                           | A0A0B7BT89           | Uncharacterized               | <i>Arion vulgaris</i>         | 5               | 2.2 %                    | 8.44 %            |
|                           | A0A3G2VHT2           | Hemocyanin $\beta$            | <i>Helix pomatia</i>          | 0               | 0.0 %                    | 6.16 %            |
|                           | A0A3G2VHR9           | Hemocyanin $\alpha$ D         | <i>Helix pomatia</i>          | 0               | 0.0 %                    | 4.95 %            |
|                           | A0A0B7AMR8           | Uncharacterized               | <i>Arion vulgaris</i>         | 3               | 5.4 %                    | 4.53 %            |
|                           | A0A3G2VFW4           | Hemocyanin $\alpha$ N         | <i>Helix pomatia</i>          | 4               | 1.5 %                    | 4.24 %            |
|                           | A0A0B7APA2           | Uncharacterized               | <i>Arion vulgaris</i>         | 1               | 2.9 %                    | 3.06 %            |
| <b>AF2</b><br>(~100 kDa)  | G3FPE6               | Hemocyanin $\alpha$ D-subunit | <i>Helix lucorum</i>          | 1               | 0.2 %                    | 33.25 %           |
|                           | A0A3G2VHF1           | Hemocyanin $\alpha$ N         | <i>Cornu aspersum</i>         | 7               | 2.5 %                    | 12.81 %           |
|                           | A0A3G2VHN3           | Hemocyanin $\beta$            | <i>Cornu aspersum</i>         | 3               | 0.7 %                    | 10.84 %           |
|                           | A0A0B7AFX7           | Uncharacterized               | <i>Arion vulgaris</i>         | 1               | 2.7 %                    | 8.84 %            |
|                           | A0A0B7BT89           | Uncharacterized               | <i>Arion vulgaris</i>         | 5               | 2.5 %                    | 8.24 %            |
|                           | A0A3G2VFQ5           | Hemocyanin $\alpha$ D         | <i>Cornu aspersum</i>         | 2               | 0.4 %                    | 7.53 %            |
| <b>AF3</b><br>(~60 kDa)   | P35903               | Achacin                       | <i>Lissachatina fulica</i>    | 27              | 43.3 %                   | 62.09 %           |
|                           | A0A3G2VHN3           | Hemocyanin $\beta$            | <i>Cornu aspersum</i>         | 2               | 0.3 %                    | 6.42 %            |
|                           | A0A3G2VFQ5           | Hemocyanin $\alpha$ D         | <i>Cornu aspersum</i>         | 2               | 0.4 %                    | 5.72 %            |
|                           | A0A0B7AFX7           | Uncharacterized               | <i>Arion vulgaris</i>         | 1               | 2.7 %                    | 4.00 %            |
|                           | A0A0B6ZW97           | Uncharacterized               | <i>Arion vulgaris</i>         | 1               | 27.4 %                   | 2.84 %            |
| <b>AF4</b><br>(~45 kDa)   | A0A0B7AZK1           | Transporter                   | <i>Arion vulgaris</i>         | 1               | 1.0 %                    | 81.28 %           |
|                           | A0A345S6Z0           | Actin, cytoplasmic            | <i>Cepaea nemoralis</i>       | 0               | 0.0 %                    | 8.56 %            |
|                           | G3FPE6               | Hemocyanin $\alpha$ D-subunit | <i>Helix lucorum</i>          | 0               | 0.0 %                    | 1.71 %            |
|                           | A0A3G2VFW4           | Hemocyanin $\alpha$ N         | <i>Helix pomatia</i>          | 1               | 0.4 %                    | 1.14 %            |
|                           | A0A0B7BT89           | Uncharacterized               | <i>Arion vulgaris</i>         | 2               | 0.5 %                    | 0.923 %           |
|                           | A0A220VX78           | Actin                         | <i>Gibbulinella dewinteri</i> | 1               | 3.8 %                    | 0.612 %           |

|                  |            |                                                      |                               |   |        |         |
|------------------|------------|------------------------------------------------------|-------------------------------|---|--------|---------|
| AF5<br>(~15 kDa) | M1HH77     | Histone H4                                           | <i>Chondrina<br/>avenacea</i> | 4 | 30.2 % | 25.48 % |
|                  | A0A0B7A7U4 | Protein kinase<br>domain-containing                  | <i>Arion vulgaris</i>         | 1 | 1.5 %  | 11.80 % |
|                  | A0A0B7C5B8 | Protein kinase<br>domain-containing                  | <i>Arion vulgaris</i>         | 1 | 16.4 % | 11.24 % |
|                  | A0A0B7AN25 | Multiple inositol<br>polyphosphate<br>phosphatase 1  | <i>Arion vulgaris</i>         | 1 | 1.6 %  | 7.56 %  |
|                  | A0A0B7A1A5 | Golgi apparatus<br>membrane protein<br>TVP23 homolog | <i>Arion vulgaris</i>         | 1 | 3.2 %  | 5.34 %  |
|                  | A0A3G2VFQ5 | Hemocyanin $\alpha$ D                                | <i>Cornu aspersum</i>         | 1 | 0.3 %  | 4.87 %  |
|                  | A0A0B6XU90 | XPGN domain-<br>containing                           | <i>Arion vulgaris</i>         | 1 | 12.1 % | 4.32 %  |
|                  | A0A0B6Y9Y9 | Histone H2B                                          | <i>Arion vulgaris</i>         | 8 | 45.3 % | 3.97 %  |
|                  | A0A0B6ZNS7 | J domain-containing                                  | <i>Arion vulgaris</i>         | 1 | 2.0 %  | 3.85 %  |
|                  | A0A0B6Y975 | Histone H2A                                          | <i>Arion vulgaris</i>         | 1 | 5.5 %  | 3.19 %  |

**Supplementary Table 8.** Identified proteins in the SDS-PAGE of *H. lucorum* d-SMG by LC-MS/MS.

| SDS-PAGE Fractions       | Protein ID (Uniprot) | Protein                                  | Organism              | Unique peptides | Unique sequence coverage | Protein abundance |
|--------------------------|----------------------|------------------------------------------|-----------------------|-----------------|--------------------------|-------------------|
| <b>HL1</b><br>(>130 kDa) | G3FPE6               | Hemocyanin $\alpha$ D-subunit            | <i>Helix lucorum</i>  | 34              | 7.8 %                    | 36.54 %           |
|                          | G3FPE5               | Hemocyanin $\beta$ -subunit              | <i>Helix lucorum</i>  | 54              | 20.2 %                   | 27.00 %           |
|                          | G3FPE7               | Hemocyanin $\alpha$ N-subunit            | <i>Helix lucorum</i>  | 40              | 20.2 %                   | 25.01 %           |
|                          | A0A3G2VFW4           | Hemocyanin $\alpha$ N                    | <i>Helix pomatia</i>  | 21              | 7.9 %                    | 3.33 %            |
|                          | A0A3G2VHR9           | Hemocyanin $\alpha$ D                    | <i>Helix pomatia</i>  | 17              | 5.0 %                    | 2.63 %            |
| <b>HL2</b><br>(~60 kDa)  | G3FPE6               | Hemocyanin $\alpha$ D-subunit            | <i>Helix lucorum</i>  | 6               | 1.7 %                    | 18.02 %           |
|                          | G3FPE7               | Hemocyanin $\alpha$ N-subunit            | <i>Helix lucorum</i>  | 8               | 4.7 %                    | 15.04 %           |
|                          | A0A0B7B016           | N domain-containing                      | <i>Arion vulgaris</i> | 1               | 7.0 %                    | 14.28 %           |
|                          | G3FPE5               | Hemocyanin $\beta$ -subunit              | <i>Helix lucorum</i>  | 6               | 1.9 %                    | 13.51 %           |
|                          | A0A0B6ZSP8           | Uncharacterized                          | <i>Arion vulgaris</i> | 1               | 2.7 %                    | 12.77 %           |
|                          | A0A0B6YKV0           | Uncharacterized                          | <i>Arion vulgaris</i> | 1               | 15.1 %                   | 11.30 %           |
|                          | A0A0B7A4J6           | Katanin p60 ATPase-containing subunit A1 | <i>Arion vulgaris</i> | 1               | 2.8 %                    | 3.82 %            |
|                          | A0A3G2VFW4           | Hemocyanin $\alpha$ N                    | <i>Helix pomatia</i>  | 4               | 1.7 %                    | 1.74 %            |
| <b>HL3</b><br>(~40 kDa)  | G3FPE6               | Hemocyanin $\alpha$ D-subunit            | <i>Helix lucorum</i>  | 7               | 2.2 %                    | 16.04 %           |
|                          | A0A0B6ZVB5           | Protein kinase domain-containing         | <i>Arion vulgaris</i> | 1               | 1.5 %                    | 14.64 %           |
|                          | G3FPE5               | Hemocyanin $\beta$ -subunit              | <i>Helix lucorum</i>  | 8               | 2.9 %                    | 12.60 %           |
|                          | G3FPE7               | Hemocyanin $\alpha$ N-subunit            | <i>Helix lucorum</i>  | 6               | 2.5 %                    | 10.10 %           |
|                          | A0A0B6Y997           | Uncharacterized                          | <i>Arion vulgaris</i> | 1               | 6.1 %                    | 6.56 %            |
|                          | A0A0B7A4J6           | Katanin p60 ATPase-containing subunit A1 | <i>Arion vulgaris</i> | 1               | 2.8 %                    | 4.91 %            |
|                          | A0A0B6YX79           | Uncharacterized                          | <i>Arion vulgaris</i> | 1               | 17.6 %                   | 4.40 %            |
|                          | A0A0B6YH37           | Uncharacterized                          | <i>Arion vulgaris</i> | 1               | 4.2 %                    | 4.19 %            |

|                            |            |                                          |                                |   |        |         |
|----------------------------|------------|------------------------------------------|--------------------------------|---|--------|---------|
|                            | A0A0B6ZYW6 | Uncharacterized                          | <i>Arion vulgaris</i>          | 1 | 23.3 % | 3.26 %  |
|                            | A0A0B6ZDR2 | Myosin_tail_1 domain-containing          | <i>Arion vulgaris</i>          | 1 | 2.5 %  | 3.19 %  |
|                            | A0A0B7B0A4 | AB hydrolase-1 domain-containing         | <i>Arion vulgaris</i>          | 1 | 2.8 %  | 2.67 %  |
| <b>HL4</b><br>(~30<br>kDa) | A0A0B7BCQ8 | Importin N-terminal domain-containing    | <i>Arion vulgaris</i>          | 1 | 0.9 %  | 32.55 % |
|                            | A0A0B7A456 | Uncharacterized                          | <i>Arion vulgaris</i>          | 1 | 7.5 %  | 15.27 % |
|                            | A0A0B6ZC31 | DUF4200 domain-containing                | <i>Arion vulgaris</i>          | 1 | 1.9 %  | 11.58 % |
|                            | A0A0B6ZKG6 | Death domain-containing                  | <i>Arion vulgaris</i>          | 1 | 6.2 %  | 8.15 %  |
|                            | A0A0B7AH50 | Uncharacterized                          | <i>Arion vulgaris</i>          | 1 | 19.6 % | 6.50 %  |
|                            | A0A0B7A4J6 | Katanin p60 ATPase-containing subunit A1 | <i>Arion vulgaris</i>          | 1 | 2.8 %  | 5.22 %  |
|                            | G3FPE6     | Hemocyanin $\alpha$ D-subunit            | <i>Helix lucorum</i>           | 6 | 1.5 %  | 5.11 %  |
| <b>HL5</b><br>(~25<br>kDa) | A6YM38     | Matrilin-like 85 kDa                     | <i>Ambigolimax valentianus</i> | 1 | 1.0 %  | 39.04 % |
|                            | A0A0B7BCQ8 | Importin N-terminal domain-containing    | <i>Arion vulgaris</i>          | 1 | 0.9 %  | 19.15 % |
|                            | A0A0B6ZY91 | Uncharacterized                          | <i>Arion vulgaris</i>          | 1 | 16.0 % | 16.63 % |
|                            | A0A0B7C6J4 | Uncharacterized                          | <i>Arion vulgaris</i>          | 1 | 15.6 % | 5.93 %  |
|                            | A0A0B7A456 | Uncharacterized                          | <i>Arion vulgaris</i>          | 1 | 7.5 %  | 4.56 %  |
|                            | A0A0B6Y1H3 | Uncharacterized                          | <i>Arion vulgaris</i>          | 1 | 6.4 %  | 3.24 %  |
|                            | A0A0B7A4J6 | Katanin p60 ATPase-containing subunit A1 | <i>Arion vulgaris</i>          | 1 | 2.8 %  | 1.93 %  |
| <b>HL6</b><br>(~15<br>kDa) | A0A0B7AQC8 | Uncharacterized                          | <i>Arion vulgaris</i>          | 1 | 0.9 %  | 9.93 %  |
|                            | G3FPE6     | Hemocyanin $\alpha$ D-subunit            | <i>Helix lucorum</i>           | 8 | 2.8 %  | 9.89 %  |
|                            | A0A0B6YNX5 | Uncharacterized                          | <i>Arion vulgaris</i>          | 1 | 8.2 %  | 9.22 %  |
|                            | G3FPE5     | Hemocyanin $\beta$ -subunit              | <i>Helix lucorum</i>           | 4 | 1.5 %  | 8.01 %  |
|                            | G3FPE7     | Hemocyanin $\alpha$ N-subunit            | <i>Helix lucorum</i>           | 4 | 1.5 %  | 6.98 %  |
|                            | P00994     | Isoinhibitor K                           | <i>Helix pomatia</i>           | 1 | 24.1 % | 5.91 %  |
|                            | A0A1X9WEF7 | Fmrfamide-related peptide 2              | <i>Deroceras reticulatum</i>   | 1 | 4.3 %  | 5.86 %  |

|            |                                                      |                           |   |        |        |
|------------|------------------------------------------------------|---------------------------|---|--------|--------|
| A0A0B6Z4T8 | Uncharacterized                                      | <i>Arion vulgaris</i>     | 1 | 13.5 % | 5.78 % |
| A0A0B6Z5Q5 | SynN domain-containing                               | <i>Arion vulgaris</i>     | 1 | 16.7 % | 4.77 % |
| A0A3G2VHR9 | Hemocyanin $\alpha$ D                                | <i>Helix pomatia</i>      | 2 | 0.4 %  | 3.99 % |
| A0A0B7AQB0 | $\beta$ -phosphoinositide-dependent protein kinase 1 | <i>Arion vulgaris</i>     | 1 | 1.4 %  | 3.36 % |
| A0A0B7A8X1 | Uncharacterized                                      | <i>Arion vulgaris</i>     | 1 | 3.2 %  | 3.06 % |
| A0A0B6ZFN8 | Uncharacterized                                      | <i>Arion vulgaris</i>     | 1 | 5.1 %  | 3.02 % |
| A0A0B7BL84 | Uncharacterized                                      | <i>Arion vulgaris</i>     | 1 | 2.4 %  | 2.71 % |
| M1HH77     | Histone H4                                           | <i>Chondrina avenacea</i> | 5 | 50.0 % | 2.59 % |

**Supplementary Table 9.** The components and their content in two d-SMGs (Mean values  $\pm$  SEM)

| Component                            | <i>A. fulica</i>  | <i>H. lucorum</i> |
|--------------------------------------|-------------------|-------------------|
| Protein (%)                          | 34.1 $\pm$ 1.71   | 46.0 $\pm$ 0.47   |
| s-GAG (%)                            | 15.9 $\pm$ 0.11   | 9.3 $\pm$ 0.11    |
| Allantoin (%)                        | 2.6 $\pm$ 0.01    | 1.0 $\pm$ 0.02    |
| Na (mg/g)                            | 63.1 $\pm$ 1.20   | 42.4 $\pm$ 1.0    |
| Mg (mg/g)                            | 14.7 $\pm$ 0.48   | 6.9 $\pm$ 0.18    |
| K (mg/g)                             | 13.1 $\pm$ 0.28   | 8.1 $\pm$ 0.10    |
| Ca (mg/g)                            | 26.40 $\pm$ 0.38  | 66.7 $\pm$ 1.46   |
| Cu (mg/kg)                           | 364.3 $\pm$ 21.10 | 265.9 $\pm$ 40.12 |
| Zn (mg/kg)                           | 42.6 $\pm$ 2.90   | 34.0 $\pm$ 5.12   |
| Fe (mg/kg)                           | 66.3 $\pm$ 8.68   | 30.6 $\pm$ 4.47   |
| Mn (mg/kg)                           | 21.4 $\pm$ 1.22   | 2.8 $\pm$ 0.44    |
| Cl <sup>-</sup> (mg/g)               | 93.2 $\pm$ 1.09   | 66.6 $\pm$ 0.86   |
| SO <sub>4</sub> <sup>2-</sup> (mg/g) | 14.8 $\pm$ 0.65   | 16.4 $\pm$ 0.36   |
| NO <sub>3</sub> <sup>-</sup> (mg/g)  | 0.16 $\pm$ 0.01   | 1.1 $\pm$ 0.08    |
| Glycolic acid (mg/g)                 | 7.1 $\pm$ 0.41    | 1.0 $\pm$ 0.18    |

**Supplementary Table 10** Content of Ca<sup>2+</sup> and Na<sup>+</sup> in d-SMG under different treatments.

|                         | Before dialysis        |                         | After dialysis in water |                         | After dialysis in 1% EDTA solution |                         |
|-------------------------|------------------------|-------------------------|-------------------------|-------------------------|------------------------------------|-------------------------|
|                         | <i>A. fulica</i> d-SMG | <i>H. lucorum</i> d-SMG | <i>A. fulica</i> d-SMG  | <i>H. lucorum</i> d-SMG | <i>A. fulica</i> d-SMG             | <i>H. lucorum</i> d-SMG |
| Ca <sup>2+</sup> (mg/g) | 26.4                   | 66.7                    | 10.8                    | 18.6                    | 0.31                               | 0.44                    |
| Na <sup>+</sup> (mg/g)  | 63.1                   | 42.4                    | 0.41                    | 0.30                    | 0.68                               | 0.69                    |

**Supplementary Table 11.** Information on the antibodies used in immunofluorescence staining and western blot.

| Antibodies              | Host   | Working Concentration (µg/mL) | Manufacturer                   | Product code |
|-------------------------|--------|-------------------------------|--------------------------------|--------------|
| CD31                    | Goat   | 10.0                          | R&D                            | AF3628       |
| α-SMA                   | Mouse  | 8.0                           | R&D                            | MAB1420      |
| CD206                   | Rabbit | 0.418                         | abcam                          | ab64693      |
| CD86                    | Mouse  | 1.0                           | abcam                          | Ab220188     |
| IL-1β                   | Goat   | 2.5                           | R&D                            | AF-401-SP    |
| STAT-1                  | Rabbit | 1.0                           | Cell Signaling Technology      | #14994       |
| p-STAT-1 (Tyr701)       | Mouse  | 1.0                           | Santa Cruz Biotechnology, Inc. | sc-136229    |
| STAT-3                  | Rabbit | 1.0                           | Cell Signaling Technology      | #4904        |
| p-STAT-3 (Tyr705)       | Rabbit | 1.0                           | Cell Signaling Technology      | #9131        |
| STAT-6                  | Rabbit | 1.0                           | Cell Signaling Technology      | #5397        |
| p-STAT-6 (Tyr641)       | Rabbit | 1.0                           | Cell Signaling Technology      | #56554       |
| β-Actin                 | Rabbit | 1.0                           | Abclonal                       | AC026        |
| Anti-Rabbit IgG (AF488) | Donkey | 1.0                           | Jackson Immuno Research        | 711-545-152  |
| Anti-Goat IgG (AF488)   | Donkey | 1.0                           | Jackson Immuno Research        | 705-545-003  |
| Anti-Mouse IgG (AF594)  | Donkey | 1.0                           | Jackson Immuno Research        | 715-585-150  |

**Supplementary Table 12. mRNA primers used in qPCR**

| Gene            | Organism  | Forward sequence       | Reverse sequence        |
|-----------------|-----------|------------------------|-------------------------|
| <i>β-actin2</i> | Rat/mouse | GGTGTGATGGTGGGTATGGG   | ACGGTTGGCCTTAGGGTTCAG   |
| <i>Nos2</i>     | Rat       | TCCCCTCCTCTACCCTACCA   | GCTTCAGTCGGGTGGTTCAT    |
| <i>Tnf</i>      | Rat       | CCCAGAAAAGCAAGCAACCAG  | CTTCCGGAGGGAGATGTGT     |
| <i>Il1b</i>     | Rat       | GACAGAACATAAGCCAACAA   | ACACAGGACAGGTATAGATTC   |
| <i>Mrc1</i>     | Rat       | GCACATACCTCAAGAGGCCA   | TTCGATGTTGCCACGAGAT     |
| <i>Arg1</i>     | Rat       | TTGATGTTGATGGACTGGA    | CTCTGGCTTATGATTACCTTC   |
| <i>Jak3</i>     | Rat       | CAGCATTGACACCCTGAGC    | CTGAAGTCACACCCGCCAGAT   |
| <i>Cd163</i>    | Rat       | AGAAGGAAGCGGACAGAT     | CTATGTATCGTGAGCAGACTA   |
| <i>Il10</i>     | Rat       | AGCTGCAGAGCTGTTTACCA   | TCATGGAAGGAGCAACCTGG    |
| <i>Tgfb</i>     | Rat       | GCAACAACGCAATCTATGA    | CAAGGTAACGCCAGGAAT      |
| <i>Vegf</i>     | Rat       | TTCGAGGAGCACTTTGGGTC   | ACTCCCTAATCTCCGGGCT     |
| <i>Coll1a1</i>  | Rat       | CGAGTATGGAAGCGAAGG     | GCAGTGATAGGTGATGTTCT    |
| <i>Col3a1</i>   | Rat       | CCATTGCTGGAGTTGGAGGT   | AGGTCTCTGCAATTCCGAGC    |
| <i>Pdgf</i>     | Rat       | TAGCACTAGGTTGGGCACTG   | TCAGTCGTCAGTGCTAGGGT    |
| <i>Mrc1</i>     | Mouse     | GTTACCTGGAGTGATGGTTCTC | AGGACATGCCAGGGTCACCTTT  |
| <i>Arg1</i>     | Mouse     | CGGGAAGACAATAACTGCACCC | CGGTTAGCAGTATGTTGTCCAGC |
| <i>Il10</i>     | Mouse     | CGGGAAGACAATAACTGCACCC | CGGTTAGCAGTATGTTGTCCAGC |

### Supplementary References

1. Arnow, L. E. Colorimetric determination of the components of 3,4-dihydroxyphenylalaninetyrosine mixtures. *J. Biol. Chem.* **118**, 531-537 (1937).
2. Farndale, R. W., Sayers, C. A., & Barrett, A. J. A direct spectrophotometric microassay for sulfated glycosaminoglycans in cartilage cultures. *Connect. Tissue Res.* **9**, 247-248 (1982).
3. Kosakai, M. Z. & Yosizawa. A partial modification of the carbazole method of Bitter and Muir for quantitation of hexuronic acids. *Anal. Biochem.* **93**, 295-298 (1979).
